# Supplementary material for: Photoinduced rearrangement of α-(2-nitrophenyl)ketones
Source: Royal Society of Chemistry journal article supplement (doi:10.1039/d2ob01546c), 2022-01-01

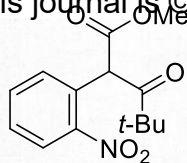

15

## Mass Spectrum SmartFormula Report

### Analysis Info

Analysis Name D:\Data\Data\_Lab\S. Yokoshima. Lab\Kitayama\SK01165.d  
Method esi\_pos\_low.m  
Sample Name SK01165  
Comment

Acquisition Date 2/24/2022 3:45:36 PM  
Operator Demo User  
Instrument compact 8255754.20198

### Acquisition Parameter

|             |            |                      |          |                  |           |
|-------------|------------|----------------------|----------|------------------|-----------|
| Source Type | ESI        | Ion Polarity         | Positive | Set Nebulizer    | 0.3 Bar   |
| Focus       | Not active | Set Capillary        | 4500 V   | Set Dry Heater   | 200 °C    |
| Scan Begin  | 50 m/z     | Set End Plate Offset | -500 V   | Set Dry Gas      | 3.0 l/min |
| Scan End    | 1500 m/z   | Set Charging Voltage | 2000 V   | Set Divert Valve | Source    |
|             |            | Set Corona           | 0 nA     | Set APCI Heater  | 0 °C      |

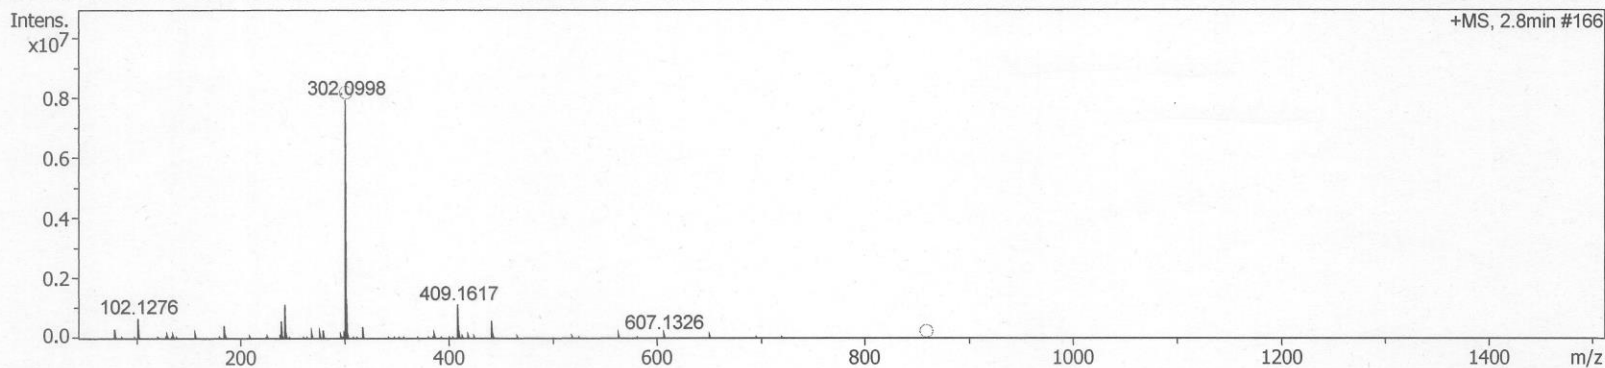

| Meas. m/z | # | Ion Formula                                       | m/z      | err [ppm] | mSigma | # mSigma | Score  | rdb | e <sup>-</sup> Conf | N-Rule |
|-----------|---|---------------------------------------------------|----------|-----------|--------|----------|--------|-----|---------------------|--------|
| 302.0998  | 1 | C <sub>14</sub> H <sub>17</sub> NNaO <sub>5</sub> | 302.0999 | 0.2       | 3.2    | 1        | 100.00 | 7.0 | even                | ok     |

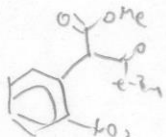

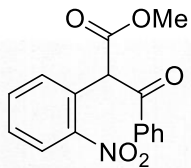

S1 (keto:enol = 3:4)

## Mass Spectrum SmartFormula Report

### Analysis Info

Analysis Name D:\Data\Data\_Lab\S. Yokoshima. Lab\Kitayama\SK01169.d  
 Method esi\_pos\_low.m  
 Sample Name SK01169  
 Comment

Acquisition Date 2/24/2022 4:42:23 PM  
 Operator Demo User  
 Instrument compact 8255754.20198

### Acquisition Parameter

|             |            |                      |          |                  |           |
|-------------|------------|----------------------|----------|------------------|-----------|
| Source Type | ESI        | Ion Polarity         | Positive | Set Nebulizer    | 0.3 Bar   |
| Focus       | Not active | Set Capillary        | 4500 V   | Set Dry Heater   | 200 °C    |
| Scan Begin  | 50 m/z     | Set End Plate Offset | -500 V   | Set Dry Gas      | 3.0 l/min |
| Scan End    | 1500 m/z   | Set Charging Voltage | 2000 V   | Set Divert Valve | Source    |
|             |            | Set Corona           | 0 nA     | Set APCI Heater  | 0 °C      |

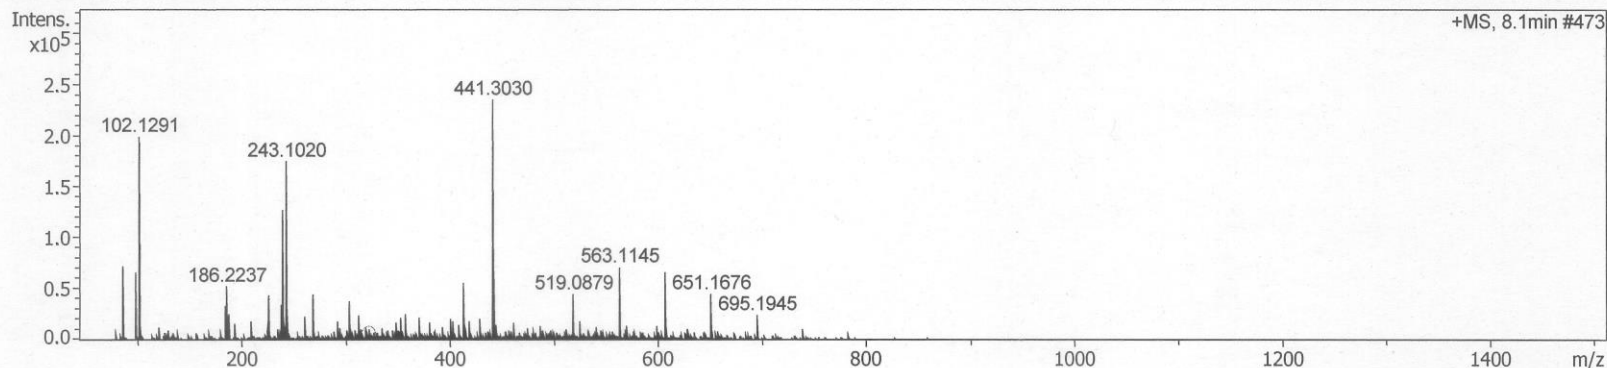

| Meas. m/z | # | Ion Formula                                       | m/z      | err [ppm] | mSigma | # mSigma | Score  | rdb  | e <sup>-</sup> Conf | N-Rule |
|-----------|---|---------------------------------------------------|----------|-----------|--------|----------|--------|------|---------------------|--------|
| 322.0686  | 1 | C <sub>16</sub> H <sub>13</sub> NNaO <sub>5</sub> | 322.0686 | -0.1      | n.a.   | 1        | 100.00 | 11.0 | even                | ok     |

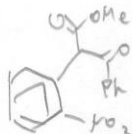

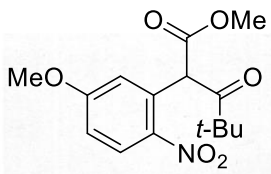

S2

# Mass Spectrum SmartFormula Report

## Analysis Info

Analysis Name D:\Data\Data\_Lab\S. Yokoshima. Lab\Kitayama\SK01167.d  
 Method esi\_pos\_low\_150to2500.m  
 Sample Name SK01167  
 Comment

Acquisition Date 3/2/2022 2:42:47 PM  
 Operator Demo User  
 Instrument compact 8255754.20198

## Acquisition Parameter

|             |            |                      |          |                  |           |
|-------------|------------|----------------------|----------|------------------|-----------|
| Source Type | ESI        | Ion Polarity         | Positive | Set Nebulizer    | 0.3 Bar   |
| Focus       | Not active | Set Capillary        | 4500 V   | Set Dry Heater   | 200 °C    |
| Scan Begin  | 50 m/z     | Set End Plate Offset | -500 V   | Set Dry Gas      | 3.0 l/min |
| Scan End    | 2500 m/z   | Set Charging Voltage | 2000 V   | Set Divert Valve | Source    |
|             |            | Set Corona           | 0 nA     | Set APCI Heater  | 0 °C      |

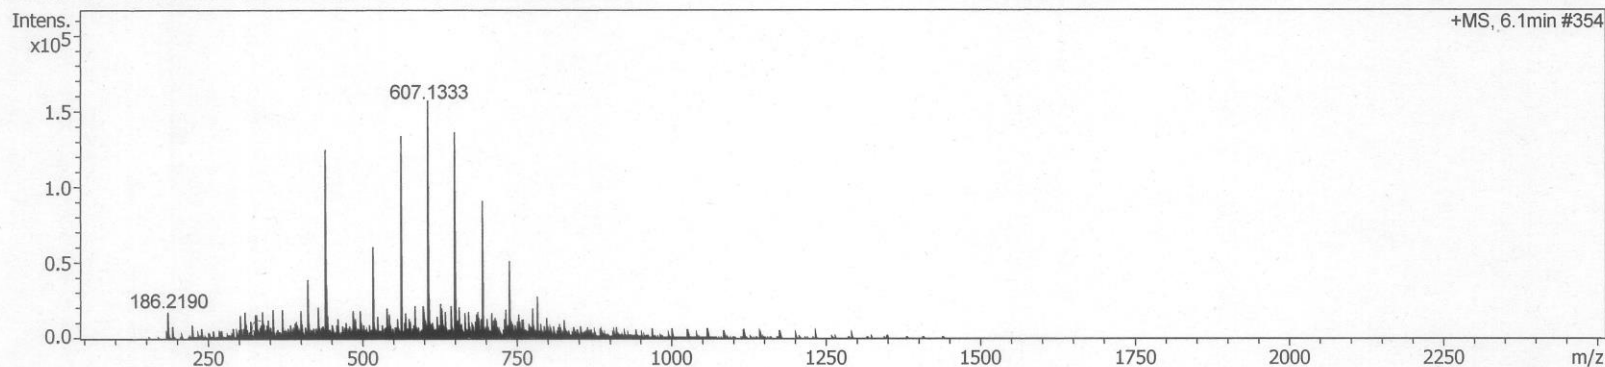

| Meas. m/z | # | Ion Formula                                       | m/z      | err [ppm] | mSigma | # mSigma | Score  | rdb | e <sup>-</sup> Conf | N-Rule |
|-----------|---|---------------------------------------------------|----------|-----------|--------|----------|--------|-----|---------------------|--------|
| 332.1105  | 1 | C <sub>15</sub> H <sub>19</sub> NNaO <sub>6</sub> | 332.1105 | -0.3      | n.a.   | 1        | 100.00 | 7.0 | even                | ok     |

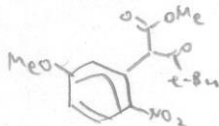

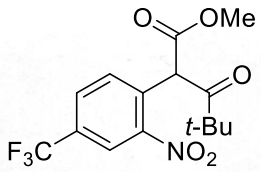

S3

# Mass Spectrum SmartFormula Report

## Analysis Info

Analysis Name: D:\Data\Data\_Lab\S. Yokoshima. Lab\Kitayama\SK01168.d  
 Method: esi\_pos\_low\_150to2500.m  
 Sample Name: SK01168  
 Comment:

Acquisition Date: 3/2/2022 1:46:40 PM  
 Operator: Demo User  
 Instrument: compact  
 8255754.20198

## Acquisition Parameter

|             |            |                      |          |                  |           |
|-------------|------------|----------------------|----------|------------------|-----------|
| Source Type | ESI        | Ion Polarity         | Positive | Set Nebulizer    | 0.3 Bar   |
| Focus       | Not active | Set Capillary        | 4500 V   | Set Dry Heater   | 200 °C    |
| Scan Begin  | 50 m/z     | Set End Plate Offset | -500 V   | Set Dry Gas      | 3.0 l/min |
| Scan End    | 2500 m/z   | Set Charging Voltage | 2000 V   | Set Divert Valve | Source    |
|             |            | Set Corona           | 0 nA     | Set APCI Heater  | 0 °C      |

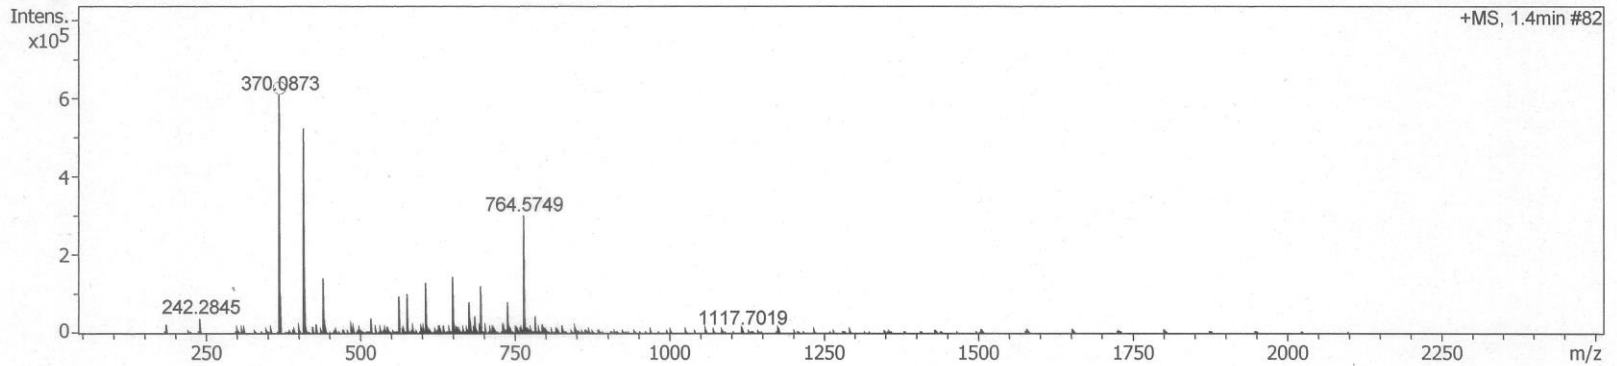

| Meas. m/z | # | Ion Formula                                                      | m/z      | err [ppm] | mSigma | # mSigma | Score  | rdb | e <sup>-</sup> Conf | N-Rule |
|-----------|---|------------------------------------------------------------------|----------|-----------|--------|----------|--------|-----|---------------------|--------|
| 370.0873  | 1 | C <sub>15</sub> H <sub>16</sub> F <sub>3</sub> NNaO <sub>5</sub> | 370.0873 | -0.1      | 2.8    | 1        | 100.00 | 7.0 | even                | ok     |

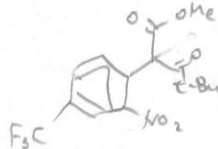

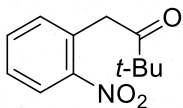

16

# Mass Spectrum SmartFormula Report

## Analysis Info

Analysis Name D:\Data\Data\_Lab\S. Yokoshima. Lab\Kitayama\SK01129.d  
 Method esi\_pos\_low\_150to2500.m  
 Sample Name SK01129  
 Comment

Acquisition Date 3/2/2022 4:08:52 PM  
 Operator Demo User  
 Instrument compact 8255754.20198

## Acquisition Parameter

|             |            |                      |          |                  |           |
|-------------|------------|----------------------|----------|------------------|-----------|
| Source Type | ESI        | Ion Polarity         | Positive | Set Nebulizer    | 0.3 Bar   |
| Focus       | Not active | Set Capillary        | 4500 V   | Set Dry Heater   | 200 °C    |
| Scan Begin  | 50 m/z     | Set End Plate Offset | -500 V   | Set Dry Gas      | 3.0 l/min |
| Scan End    | 2500 m/z   | Set Charging Voltage | 2000 V   | Set Divert Valve | Source    |
|             |            | Set Corona           | 0 nA     | Set APCI Heater  | 0 °C      |

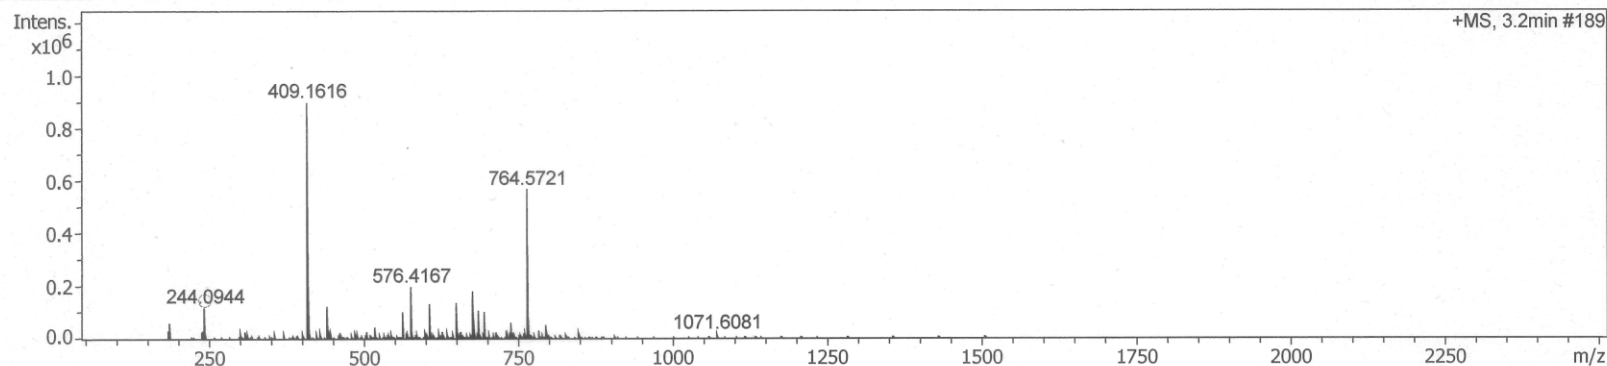

| Meas. m/z | # | Ion Formula                                       | m/z      | err [ppm] | mSigma | # mSigma | Score  | rdb | e <sup>-</sup> Conf | N-Rule |
|-----------|---|---------------------------------------------------|----------|-----------|--------|----------|--------|-----|---------------------|--------|
| 244.0944  | 1 | C <sub>12</sub> H <sub>15</sub> NNaO <sub>3</sub> | 244.0944 | 0.3       | 5.0    | 1        | 100.00 | 6.0 | even                | ok     |

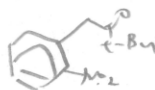

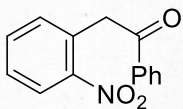

S4

# Compound Spectrum SmartFormula Report

## Analysis Info

Analysis Name D:\Data\Data\_Lab\S. Yokoshima. Lab\Kitayama\SK01171.d  
 Method esi\_pos\_low.m  
 Sample Name SK01171  
 Comment

Acquisition Date 2/14/2022 3:43:51 PM  
 Operator Demo User  
 Instrument compact 8255754.20198

## Acquisition Parameter

|             |            |                      |          |                  |           |
|-------------|------------|----------------------|----------|------------------|-----------|
| Source Type | ESI        | Ion Polarity         | Positive | Set Nebulizer    | 0.3 Bar   |
| Focus       | Not active | Set Capillary        | 4500 V   | Set Dry Heater   | 200 °C    |
| Scan Begin  | 50 m/z     | Set End Plate Offset | -500 V   | Set Dry Gas      | 3.0 l/min |
| Scan End    | 2500 m/z   | Set Charging Voltage | 2000 V   | Set Divert Valve | Source    |
|             |            | Set Corona           | 0 nA     | Set APCI Heater  | 0 °C      |

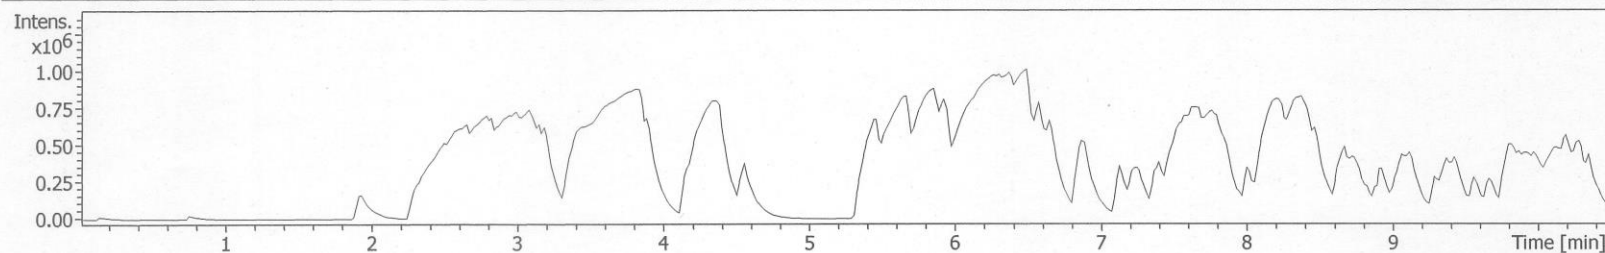

## +MS, 10.2min #596

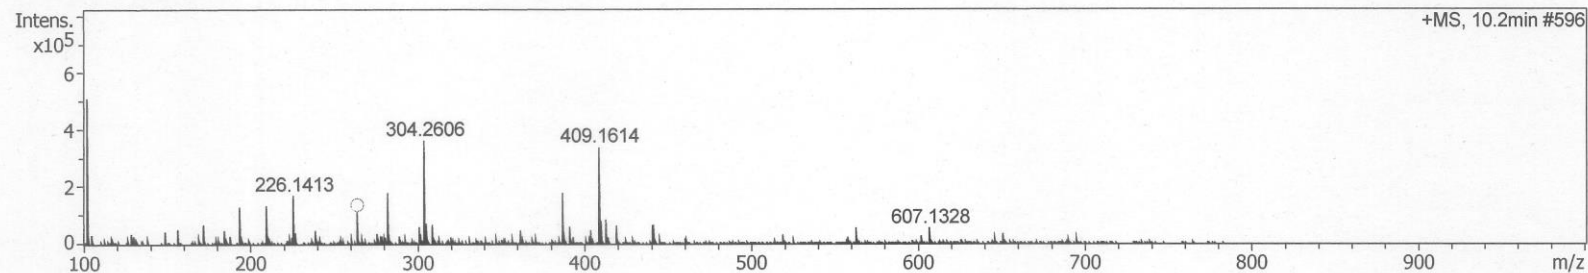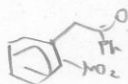

| Meas. m/z | # | Ion Formula | m/z      | err [ppm] | mSigma | # mSigma | Score  | rdb  | e <sup>-</sup> Conf | N-Rule |
|-----------|---|-------------|----------|-----------|--------|----------|--------|------|---------------------|--------|
| 264.0631  | 1 | C14H11NNaO3 | 264.0631 | -0.1      | 3.4    | 1        | 100.00 | 10.0 | even                | ok     |

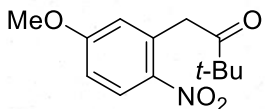

S5

# Compound Spectrum SmartFormula Report

## Analysis Info

Analysis Name D:\Data\Data\_Lab\S. Yokoshima. Lab\Kitayama\SK01172.d  
 Method esi\_pos\_low.m  
 Sample Name SK01172  
 Comment

Acquisition Date 2/14/2022 4:03:33 PM  
 Operator Demo User  
 Instrument compact 8255754.20198

## Acquisition Parameter

|             |            |                      |          |                  |           |
|-------------|------------|----------------------|----------|------------------|-----------|
| Source Type | ESI        | Ion Polarity         | Positive | Set Nebulizer    | 0.3 Bar   |
| Focus       | Not active | Set Capillary        | 4500 V   | Set Dry Heater   | 200 °C    |
| Scan Begin  | 50 m/z     | Set End Plate Offset | -500 V   | Set Dry Gas      | 3.0 l/min |
| Scan End    | 2500 m/z   | Set Charging Voltage | 2000 V   | Set Divert Valve | Source    |
|             |            | Set Corona           | 0 nA     | Set APCI Heater  | 0 °C      |

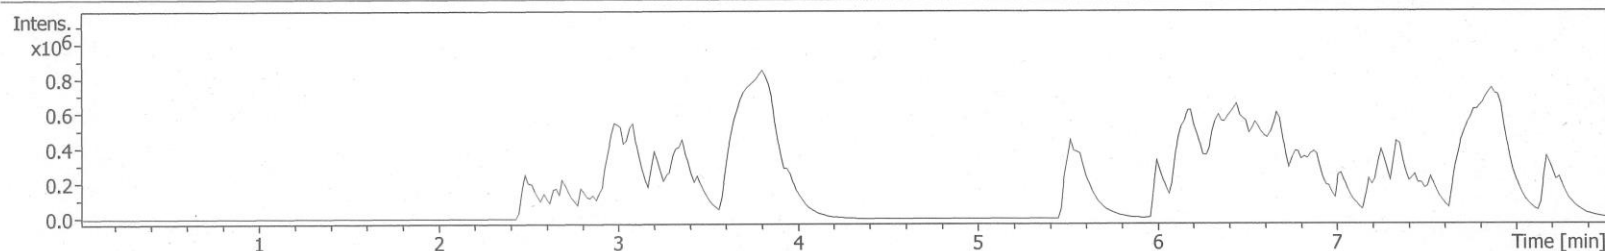

## +MS, 8.3min #485

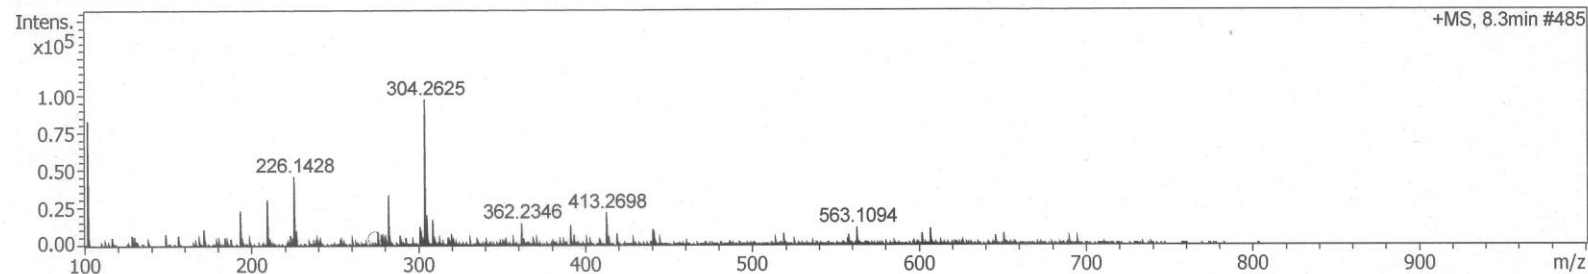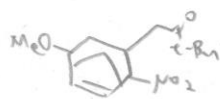

| Meas. m/z | # | Ion Formula | m/z      | err [ppm] | mSigma | # mSigma | Score  | rdb | e <sup>-</sup> Conf | N-Rule |
|-----------|---|-------------|----------|-----------|--------|----------|--------|-----|---------------------|--------|
| 274.1050  | 1 | C13H17NNaO4 | 274.1050 | -0.2      | 467.4  | 1        | 100.00 | 6.0 | even                | ok     |

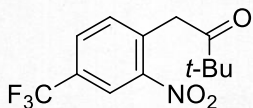

S6

# Mass Spectrum SmartFormula Report

## Analysis Info

Analysis Name D:\Data\Data\_Lab\S. Yokoshima. Lab\Kitayama\SK01170.d  
 Method esi\_pos\_low\_150to2500.m  
 Sample Name SK01170  
 Comment

Acquisition Date 3/2/2022 1:54:03 PM

Operator Demo User  
 Instrument compact 8255754.20198

## Acquisition Parameter

|             |            |                      |          |                  |           |
|-------------|------------|----------------------|----------|------------------|-----------|
| Source Type | ESI        | Ion Polarity         | Positive | Set Nebulizer    | 0.3 Bar   |
| Focus       | Not active | Set Capillary        | 4500 V   | Set Dry Heater   | 200 °C    |
| Scan Begin  | 50 m/z     | Set End Plate Offset | -500 V   | Set Dry Gas      | 3.0 l/min |
| Scan End    | 2500 m/z   | Set Charging Voltage | 2000 V   | Set Divert Valve | Source    |
|             |            | Set Corona           | 0 nA     | Set APCI Heater  | 0 °C      |

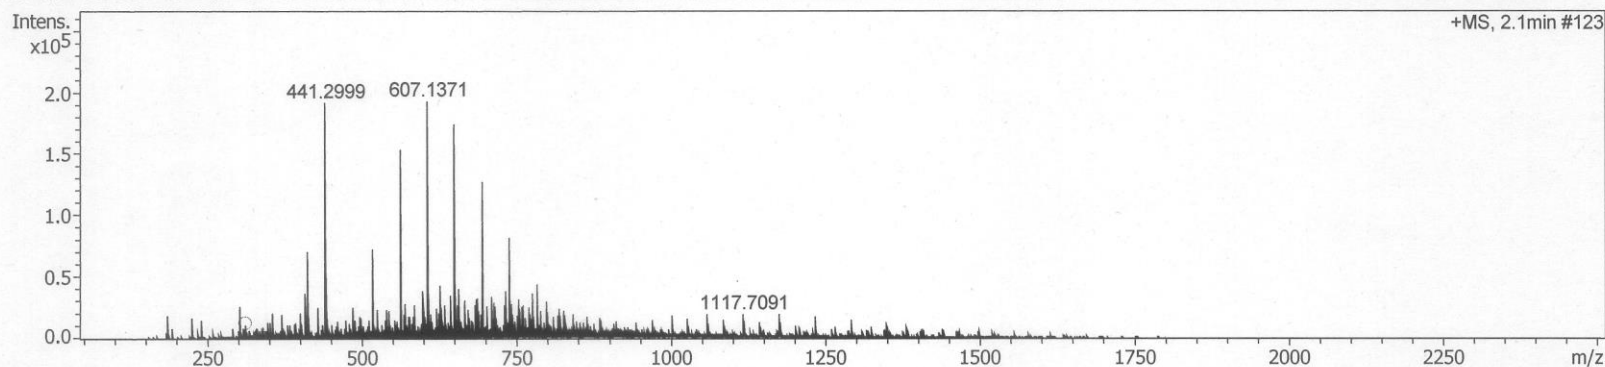

| Meas. m/z | # | Ion Formula   | m/z      | err [ppm] | mSigma | # mSigma | Score  | rdb | e <sup>-</sup> Conf | N-Rule |
|-----------|---|---------------|----------|-----------|--------|----------|--------|-----|---------------------|--------|
| 312.0818  | 1 | C13H14F3NNaO3 | 312.0818 | -0.2      | 31.3   | 1        | 100.00 | 6.0 | even                | ok     |

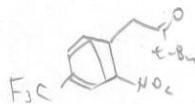



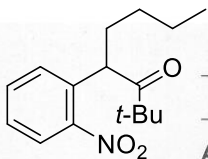

17

# Mass Spectrum SmartFormula Report

## Analysis Info

Analysis Name: D:\Data\Data\_Lab\S. Yokoshima. Lab\Kitayama\SK01032.d  
 Method: esi\_pos\_low\_150to2500.m  
 Sample Name: SK01032  
 Comment:

Acquisition Date: 3/2/2022 4:15:44 PM  
 Operator: Demo User  
 Instrument: compact  
 8255754.20198

## Acquisition Parameter

|             |            |                      |          |                  |           |
|-------------|------------|----------------------|----------|------------------|-----------|
| Source Type | ESI        | Ion Polarity         | Positive | Set Nebulizer    | 0.3 Bar   |
| Focus       | Not active | Set Capillary        | 4500 V   | Set Dry Heater   | 200 °C    |
| Scan Begin  | 50 m/z     | Set End Plate Offset | -500 V   | Set Dry Gas      | 3.0 l/min |
| Scan End    | 2500 m/z   | Set Charging Voltage | 2000 V   | Set Divert Valve | Source    |
|             |            | Set Corona           | 0 nA     | Set APCI Heater  | 0 °C      |

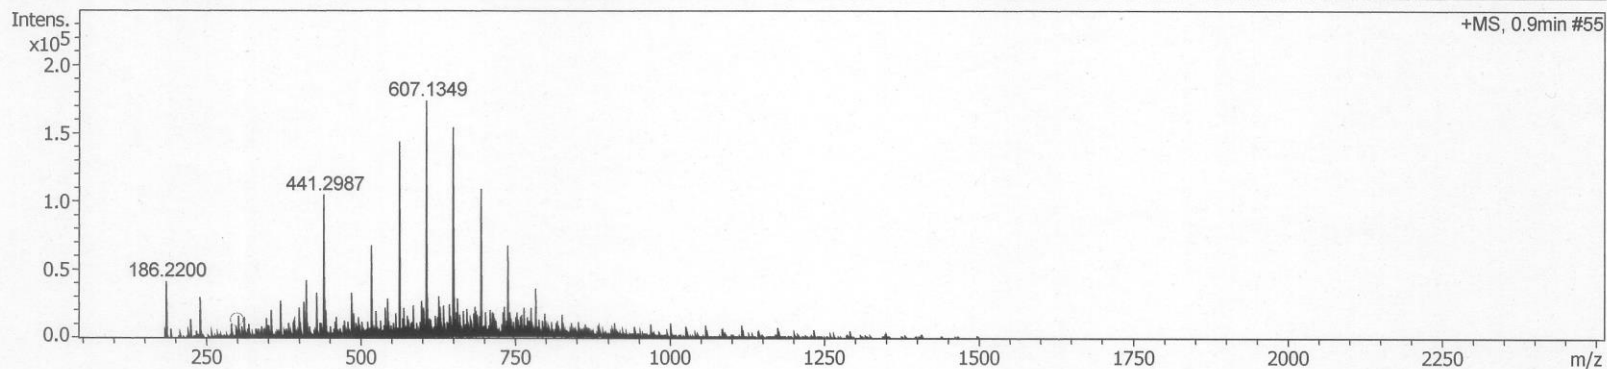

| Meas. m/z | # | Ion Formula                                       | m/z      | err [ppm] | mSigma | # mSigma | Score  | rdb | e <sup>-</sup> Conf | N-Rule |
|-----------|---|---------------------------------------------------|----------|-----------|--------|----------|--------|-----|---------------------|--------|
| 300.1570  | 1 | C <sub>16</sub> H <sub>23</sub> NNaO <sub>3</sub> | 300.1570 | -0.0      | n.a.   | 1        | 100.00 | 6.0 | even                | ok     |

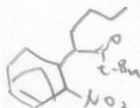

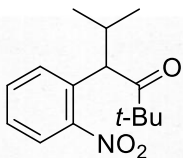

S7

# Compound Spectrum SmartFormula Report

## Analysis Info

Analysis Name D:\Data\Data\_Lab\S. Yokoshima. Lab\Kitayama\SK01149.d  
 Method esi\_pos\_low.m  
 Sample Name SK01149  
 Comment

Acquisition Date 2/14/2022 4:19:13 PM  
 Operator Demo User  
 Instrument compact 8255754.20198

## Acquisition Parameter

|             |            |                      |          |                  |           |
|-------------|------------|----------------------|----------|------------------|-----------|
| Source Type | ESI        | Ion Polarity         | Positive | Set Nebulizer    | 0.3 Bar   |
| Focus       | Not active | Set Capillary        | 4500 V   | Set Dry Heater   | 200 °C    |
| Scan Begin  | 50 m/z     | Set End Plate Offset | -500 V   | Set Dry Gas      | 3.0 l/min |
| Scan End    | 2500 m/z   | Set Charging Voltage | 2000 V   | Set Divert Valve | Source    |
|             |            | Set Corona           | 0 nA     | Set APCI Heater  | 0 °C      |

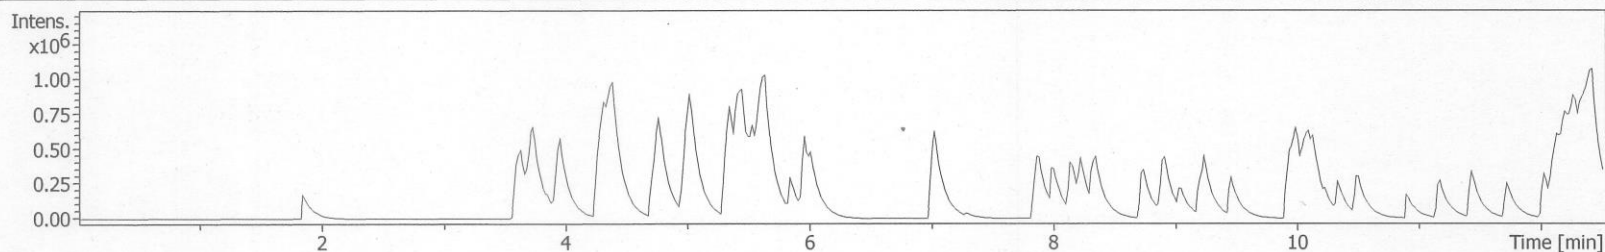

## +MS, 11.4min #664

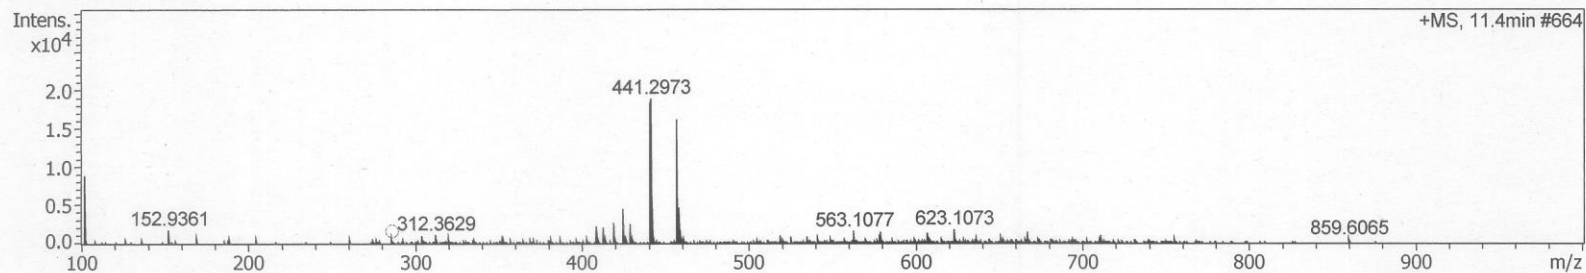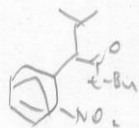

| Meas. m/z | # | Ion Formula                                       | m/z      | err [ppm] | mSigma | # mSigma | Score  | rdb | e <sup>-</sup> Conf | N-Rule |
|-----------|---|---------------------------------------------------|----------|-----------|--------|----------|--------|-----|---------------------|--------|
| 286.1414  | 1 | C <sub>15</sub> H <sub>21</sub> NNaO <sub>3</sub> | 286.1414 | -0.3      | 48.2   | 1        | 100.00 | 6.0 | even                | ok     |

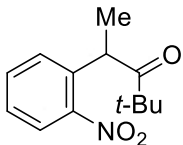

S8

# Compound Spectrum SmartFormula Report

## Analysis Info

Analysis Name D:\Data\Data\_Lab\S. Yokoshima. Lab\Kitayama\SK03023 P.d  
 Method esi\_pos\_low\_150to2500.m  
 Sample Name SK03023 P  
 Comment

Acquisition Date 9/11/2022 7:05:52 PM  
 Operator Demo User  
 Instrument compact 8255754.20198

## Acquisition Parameter

|             |            |                       |            |                  |           |
|-------------|------------|-----------------------|------------|------------------|-----------|
| Source Type | ESI        | Ion Polarity          | Positive   | Set Nebulizer    | 0.3 Bar   |
| Focus       | Not active | Set Capillary         | 4500 V     | Set Dry Heater   | 200 °C    |
| Scan Begin  | 50 m/z     | Set End Plate Offset  | -500 V     | Set Dry Gas      | 3.0 l/min |
| Scan End    | 2500 m/z   | Set Collision Cell RF | 1300.0 Vpp | Set Divert Valve | Source    |

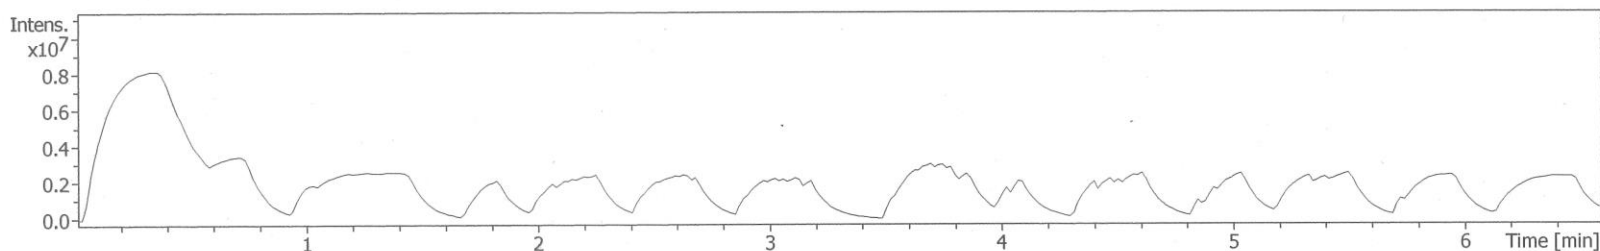

| # | RT [min] | Area | Int. Type | I       | S/N | Trace       | Max. m/z | FWHM [min] |
|---|----------|------|-----------|---------|-----|-------------|----------|------------|
| 1 | 5.3      | 0    |           | 2034477 |     | BPC +All MS | 441.2968 |            |

## Cmpd 1, 5.3 min

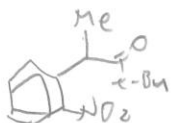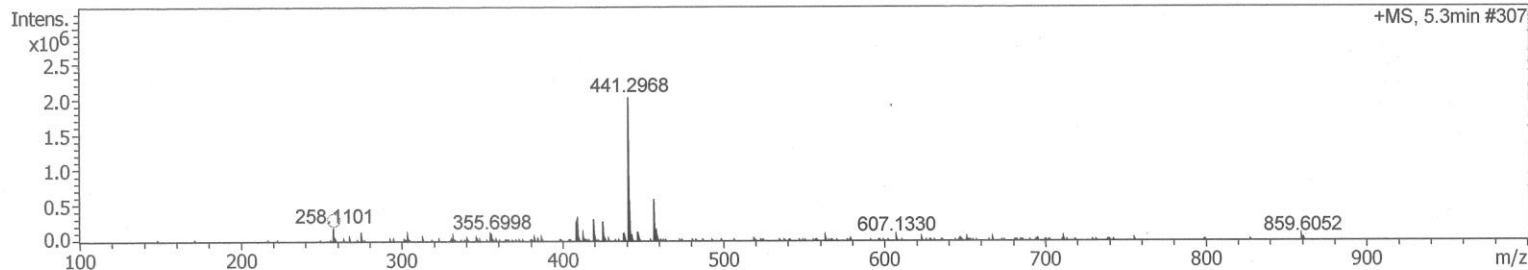

| Meas. m/z | # | Ion Formula | m/z      | err [ppm] | mSigma | # mSigma | Score  | rdb | e <sup>-</sup> Conf | N-Rule |
|-----------|---|-------------|----------|-----------|--------|----------|--------|-----|---------------------|--------|
| 258.1101  | 1 | C13H17NNaO3 | 258.1101 | -0.3      | 10.3   | 1        | 100.00 | 6.0 | even                | ok     |

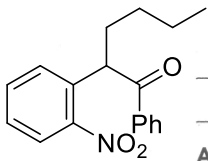

S9

# Mass Spectrum SmartFormula Report

## Analysis Info

Analysis Name D:\Data\Data\_Lab\S. Yokoshima. Lab\Kitayama\SK01067.d  
 Method esi\_pos\_low.m  
 Sample Name SK01067  
 Comment

Acquisition Date 2/24/2022 5:07:28 PM  
 Operator Demo User  
 Instrument compact 8255754.20198

## Acquisition Parameter

|             |            |                      |          |                  |           |
|-------------|------------|----------------------|----------|------------------|-----------|
| Source Type | ESI        | Ion Polarity         | Positive | Set Nebulizer    | 0.3 Bar   |
| Focus       | Not active | Set Capillary        | 4500 V   | Set Dry Heater   | 200 °C    |
| Scan Begin  | 50 m/z     | Set End Plate Offset | -500 V   | Set Dry Gas      | 3.0 l/min |
| Scan End    | 1500 m/z   | Set Charging Voltage | 2000 V   | Set Divert Valve | Source    |
|             |            | Set Corona           | 0 nA     | Set APCI Heater  | 0 °C      |

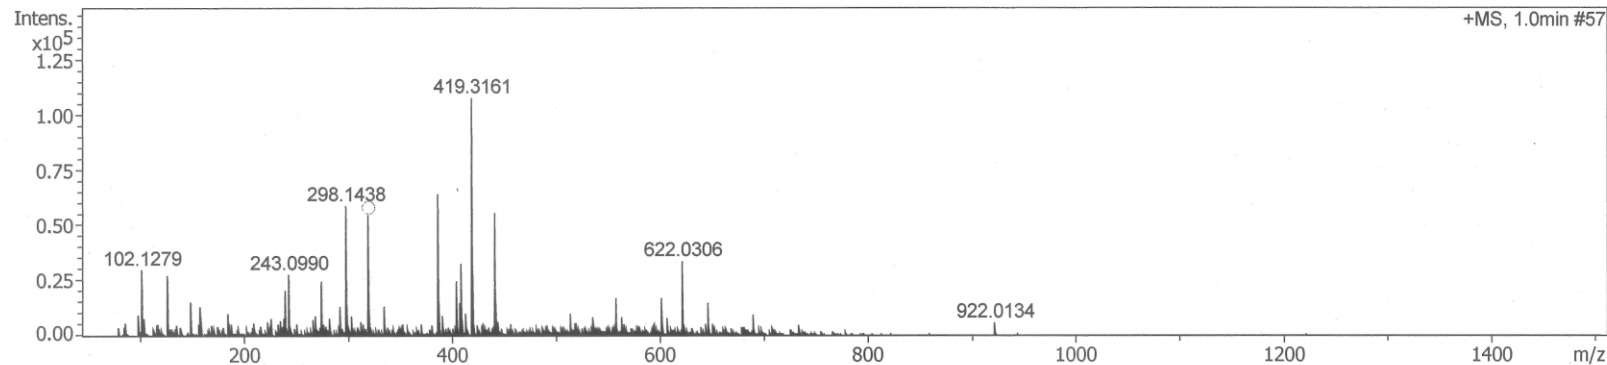

| Meas. m/z | # | Ion Formula | m/z      | err [ppm] | mSigma | # mSigma | Score  | rdb  | e <sup>-</sup> Conf | N-Rule |
|-----------|---|-------------|----------|-----------|--------|----------|--------|------|---------------------|--------|
| 320.1257  | 1 | C18H19NNaO3 | 320.1257 | -0.1      | 7.0    | 1        | 100.00 | 10.0 | even                | ok     |

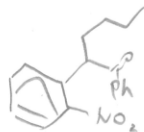

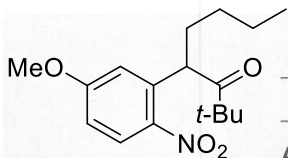

S10

# Mass Spectrum SmartFormula Report

## Analysis Info

Analysis Name D:\Data\Data\_Lab\S. Yokoshima. Lab\Kitayama\SK01145.d  
 Method esi\_pos\_low\_150to2500.m  
 Sample Name SK01145  
 Comment

Acquisition Date 3/2/2022 2:55:50 PM  
 Operator Demo User  
 Instrument compact 8255754.20198

## Acquisition Parameter

|             |            |                      |          |                  |           |
|-------------|------------|----------------------|----------|------------------|-----------|
| Source Type | ESI        | Ion Polarity         | Positive | Set Nebulizer    | 0.3 Bar   |
| Focus       | Not active | Set Capillary        | 4500 V   | Set Dry Heater   | 200 °C    |
| Scan Begin  | 50 m/z     | Set End Plate Offset | -500 V   | Set Dry Gas      | 3.0 l/min |
| Scan End    | 2500 m/z   | Set Charging Voltage | 2000 V   | Set Divert Valve | Source    |
|             |            | Set Corona           | 0 nA     | Set APCI Heater  | 0 °C      |

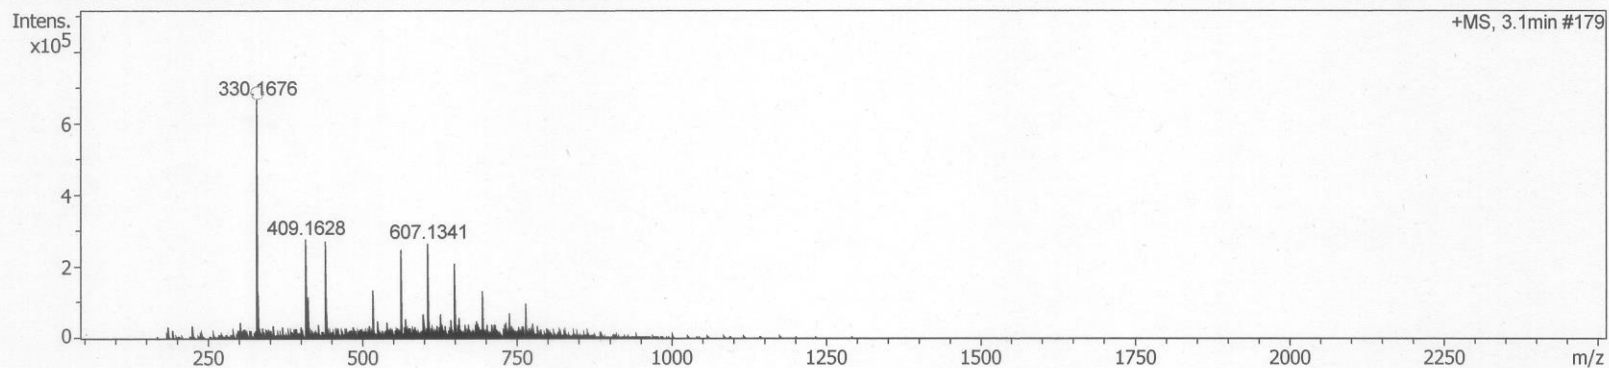

| Meas. m/z | # | Ion Formula | m/z      | err [ppm] | mSigma | # mSigma | Score  | rdb | e <sup>-</sup> Conf | N-Rule |
|-----------|---|-------------|----------|-----------|--------|----------|--------|-----|---------------------|--------|
| 330.1676  | 1 | C17H25NNaO4 | 330.1676 | -0.2      | 5.8    | 1        | 100.00 | 6.0 | even                | ok     |

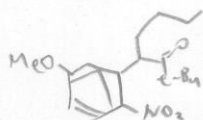

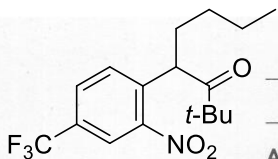

S11

# Mass Spectrum SmartFormula Report

## Analysis Info

Analysis Name D:\Data\Data\_Lab\S. Yokoshima. Lab\Kitayama\SK01139 again.d  
 Method esi\_pos\_low\_150to2500.m  
 Sample Name SK01139 again  
 Comment

Acquisition Date 3/2/2022 2:32:08 PM  
 Operator Demo User  
 Instrument compact 8255754.20198

## Acquisition Parameter

|             |            |                      |          |                  |           |
|-------------|------------|----------------------|----------|------------------|-----------|
| Source Type | ESI        | Ion Polarity         | Positive | Set Nebulizer    | 0.3 Bar   |
| Focus       | Not active | Set Capillary        | 4500 V   | Set Dry Heater   | 200 °C    |
| Scan Begin  | 50 m/z     | Set End Plate Offset | -500 V   | Set Dry Gas      | 3.0 l/min |
| Scan End    | 2500 m/z   | Set Charging Voltage | 2000 V   | Set Divert Valve | Source    |
|             |            | Set Corona           | 0 nA     | Set APCI Heater  | 0 °C      |

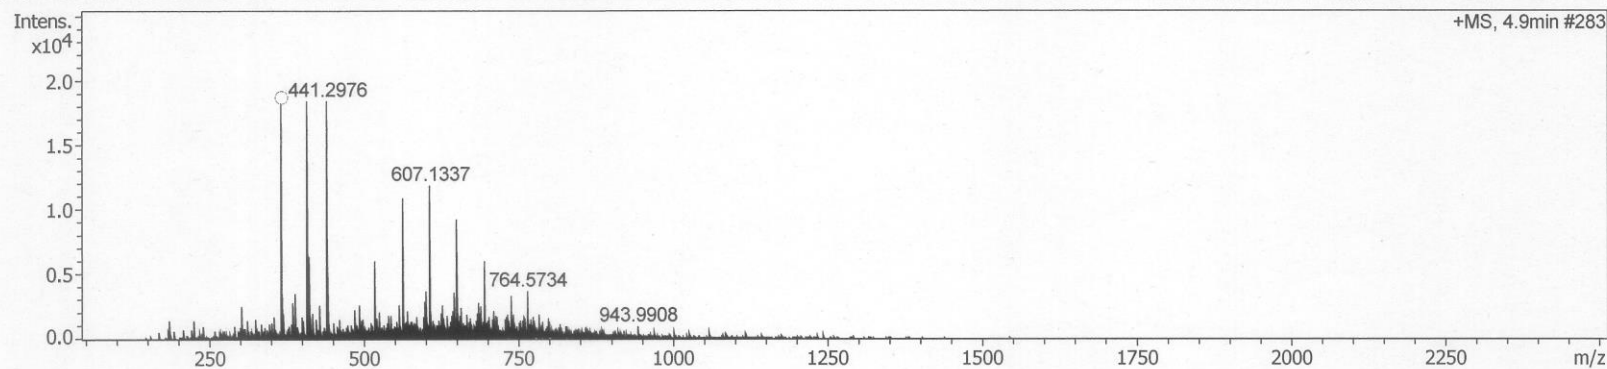

| Meas. m/z | # | Ion Formula   | m/z      | err [ppm] | mSigma | # mSigma | Score  | rdb | e <sup>-</sup> Conf | N-Rule |
|-----------|---|---------------|----------|-----------|--------|----------|--------|-----|---------------------|--------|
| 368.1444  | 1 | C17H22F3NNaO3 | 368.1444 | 0.1       | 1.5    | 1        | 100.00 | 6.0 | even                | ok     |

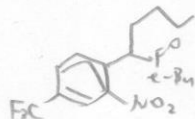

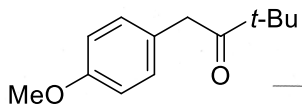

S12b

# Mass Spectrum SmartFormula Report

## Analysis Info

Analysis Name D:\Data\Data\_Lab\S. Yokoshima. Lab\Kitayama\SK02170 P re000001.d  
 Method esi\_pos\_low\_150to2500.m  
 Sample Name SK02170 P re  
 Comment

Acquisition Date 8/8/2022 2:03:38 PM  
 Operator Demo User  
 Instrument compact 8255754.20198

## Acquisition Parameter

|             |            |                      |          |                  |           |
|-------------|------------|----------------------|----------|------------------|-----------|
| Source Type | ESI        | Ion Polarity         | Positive | Set Nebulizer    | 0.3 Bar   |
| Focus       | Not active | Set Capillary        | 4500 V   | Set Dry Heater   | 200 °C    |
| Scan Begin  | 50 m/z     | Set End Plate Offset | -500 V   | Set Dry Gas      | 3.0 l/min |
| Scan End    | 2500 m/z   | Set Charging Voltage | 2000 V   | Set Divert Valve | Source    |
|             |            | Set Corona           | 0 nA     | Set APCI Heater  | 0 °C      |

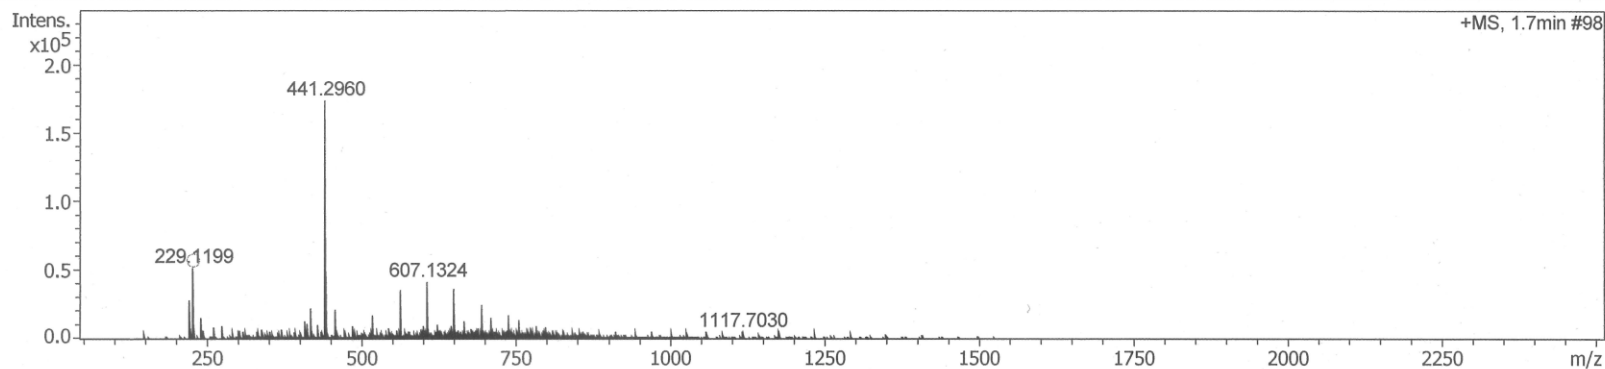

| Meas. m/z | # | Ion Formula | m/z      | err [ppm] | mSigma | # mSigma | Score  | rdb | e <sup>-</sup> Conf | N-Rule |
|-----------|---|-------------|----------|-----------|--------|----------|--------|-----|---------------------|--------|
| 229.1199  | 1 | C13H18NaO2  | 229.1199 | -0.2      | 17.8   | 1        | 100.00 | 5.0 | even                | ok     |

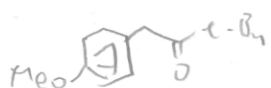

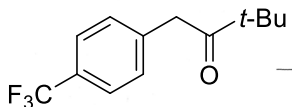

**S12c**

# Mass Spectrum SmartFormula Report

## Analysis Info

Analysis Name D:\Data\Data\_Lab\S. Yokoshima. Lab\Kitayama\SK02161 P000001.d  
 Method esi\_pos\_low\_150to2500.m  
 Sample Name SK02161 P  
 Comment

Acquisition Date 8/8/2022 2:09:25 PM  
 Operator Demo User  
 Instrument compact 8255754.20198

## Acquisition Parameter

|             |            |                      |          |                  |           |
|-------------|------------|----------------------|----------|------------------|-----------|
| Source Type | ESI        | Ion Polarity         | Positive | Set Nebulizer    | 0.3 Bar   |
| Focus       | Not active | Set Capillary        | 4500 V   | Set Dry Heater   | 200 °C    |
| Scan Begin  | 50 m/z     | Set End Plate Offset | -500 V   | Set Dry Gas      | 3.0 l/min |
| Scan End    | 2500 m/z   | Set Charging Voltage | 2000 V   | Set Divert Valve | Source    |
|             |            | Set Corona           | 0 nA     | Set APCI Heater  | 0 °C      |

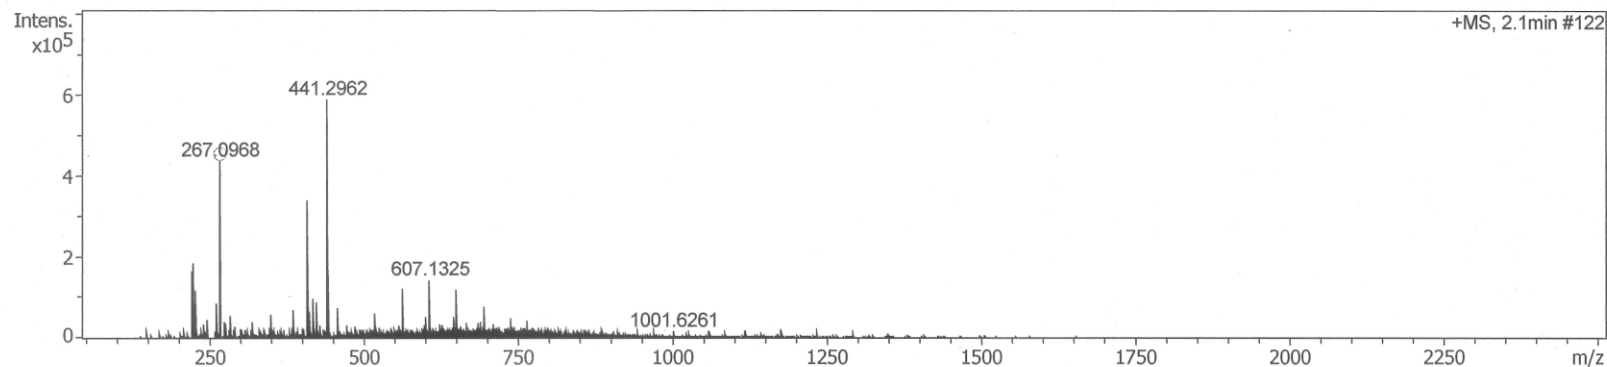

| Meas. m/z | # | Ion Formula | m/z      | err [ppm] | mSigma | # mSigma | Score  | rdb | e <sup>-</sup> Conf | N-Rule |
|-----------|---|-------------|----------|-----------|--------|----------|--------|-----|---------------------|--------|
| 267.0968  | 1 | C13H15F3NaO | 267.0967 | -0.4      | 2.2    | 1        | 100.00 | 5.0 | even                | ok     |

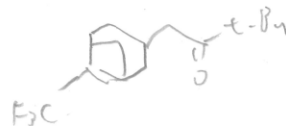



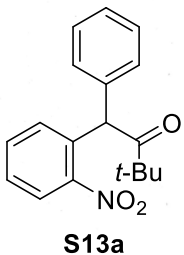

# Mass Spectrum SmartFormula Report

## Analysis Info

Analysis Name D:\Data\Data\_Lab\S. Yokoshima. Lab\Kitayama\SK02174 P re000001.d  
 Method esi\_pos\_low\_150to2500.m  
 Sample Name SK02174 P re  
 Comment

Acquisition Date 8/8/2022 1:53:15 PM  
 Operator Demo User  
 Instrument compact 8255754.20198

## Acquisition Parameter

|             |            |                      |          |                  |           |
|-------------|------------|----------------------|----------|------------------|-----------|
| Source Type | ESI        | Ion Polarity         | Positive | Set Nebulizer    | 0.3 Bar   |
| Focus       | Not active | Set Capillary        | 4500 V   | Set Dry Heater   | 200 °C    |
| Scan Begin  | 50 m/z     | Set End Plate Offset | -500 V   | Set Dry Gas      | 3.0 l/min |
| Scan End    | 2500 m/z   | Set Charging Voltage | 2000 V   | Set Divert Valve | Source    |
|             |            | Set Corona           | 0 nA     | Set APCI Heater  | 0 °C      |

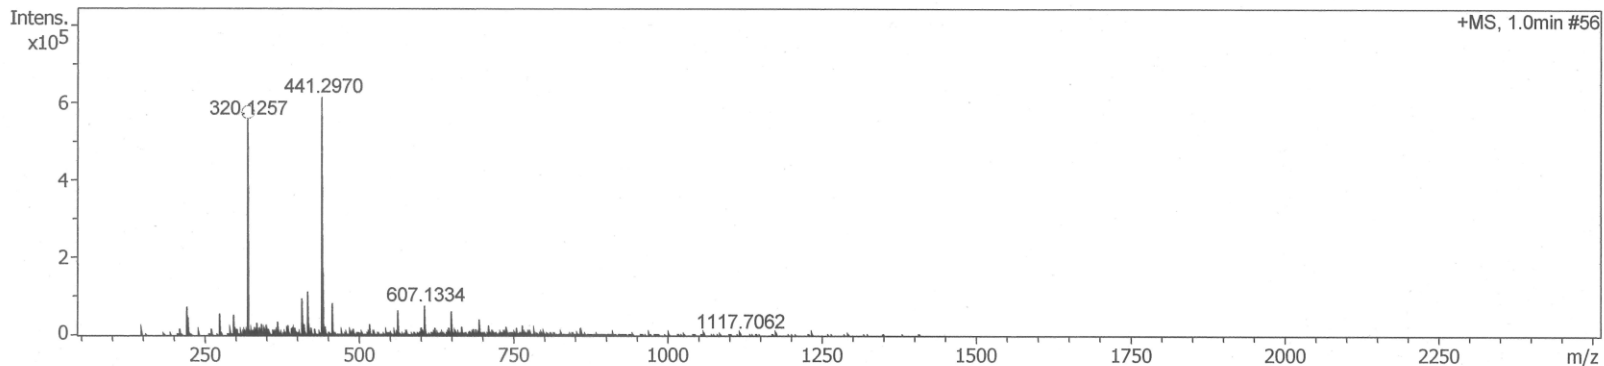

| Meas. m/z | # | Ion Formula                                       | m/z      | err [ppm] | mSigma | # mSigma | Score  | rdb  | e <sup>-</sup> Conf | N-Rule |
|-----------|---|---------------------------------------------------|----------|-----------|--------|----------|--------|------|---------------------|--------|
| 320.1257  | 1 | C <sub>18</sub> H <sub>19</sub> NNaO <sub>3</sub> | 320.1257 | -0.0      | 11.2   | 1        | 100.00 | 10.0 | even                | ok     |

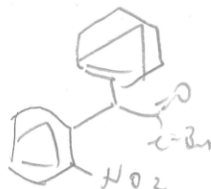

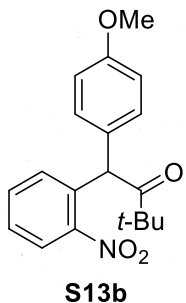

# Mass Spectrum SmartFormula Report

## Analysis Info

Analysis Name D:\Data\Data\_Lab\S. Yokoshima. Lab\Kitayama\SK02173 P000001.d  
 Method esi\_pos\_low\_150to2500.m  
 Sample Name SK02173 P  
 Comment

Acquisition Date 8/8/2022 2:24:58 PM  
 Operator Demo User  
 Instrument compact 8255754.20198

## Acquisition Parameter

|             |            |                      |          |                  |           |
|-------------|------------|----------------------|----------|------------------|-----------|
| Source Type | ESI        | Ion Polarity         | Positive | Set Nebulizer    | 0.3 Bar   |
| Focus       | Not active | Set Capillary        | 4500 V   | Set Dry Heater   | 200 °C    |
| Scan Begin  | 50 m/z     | Set End Plate Offset | -500 V   | Set Dry Gas      | 3.0 l/min |
| Scan End    | 2500 m/z   | Set Charging Voltage | 2000 V   | Set Divert Valve | Source    |
|             |            | Set Corona           | 0 nA     | Set APCI Heater  | 0 °C      |

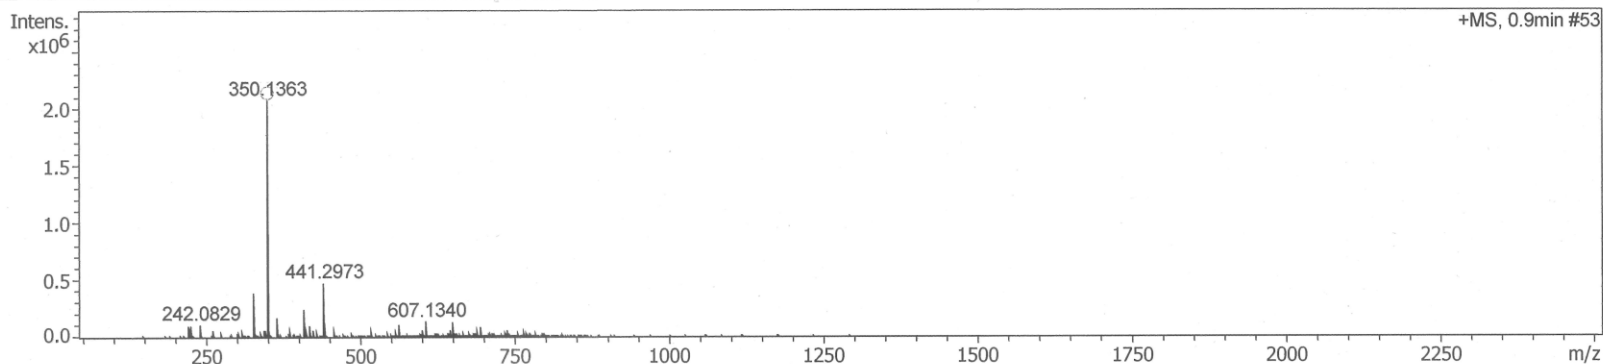

| Meas. m/z | # | Ion Formula                                       | m/z      | err [ppm] | mSigma | # mSigma | Score  | rdb  | e <sup>-</sup> Conf | N-Rule |
|-----------|---|---------------------------------------------------|----------|-----------|--------|----------|--------|------|---------------------|--------|
| 350.1363  | 1 | C <sub>19</sub> H <sub>21</sub> NNaO <sub>4</sub> | 350.1363 | -0.1      | 2.0    | 1        | 100.00 | 10.0 | even                | ok     |

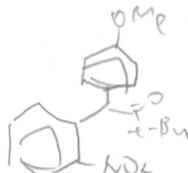

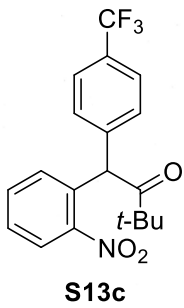

# Mass Spectrum SmartFormula Report

## Analysis Info

Analysis Name D:\Data\Data\_Lab\S. Yokoshima. Lab\Kitayama\SK02163 P000001.d  
 Method esi\_pos\_low\_150to2500.m  
 Sample Name SK02163 P  
 Comment

Acquisition Date 8/8/2022 2:29:19 PM  
 Operator Demo User  
 Instrument compact 8255754.20198

## Acquisition Parameter

|             |            |                      |          |                  |           |
|-------------|------------|----------------------|----------|------------------|-----------|
| Source Type | ESI        | Ion Polarity         | Positive | Set Nebulizer    | 0.3 Bar   |
| Focus       | Not active | Set Capillary        | 4500 V   | Set Dry Heater   | 200 °C    |
| Scan Begin  | 50 m/z     | Set End Plate Offset | -500 V   | Set Dry Gas      | 3.0 l/min |
| Scan End    | 2500 m/z   | Set Charging Voltage | 2000 V   | Set Divert Valve | Source    |
|             |            | Set Corona           | 0 nA     | Set APCI Heater  | 0 °C      |

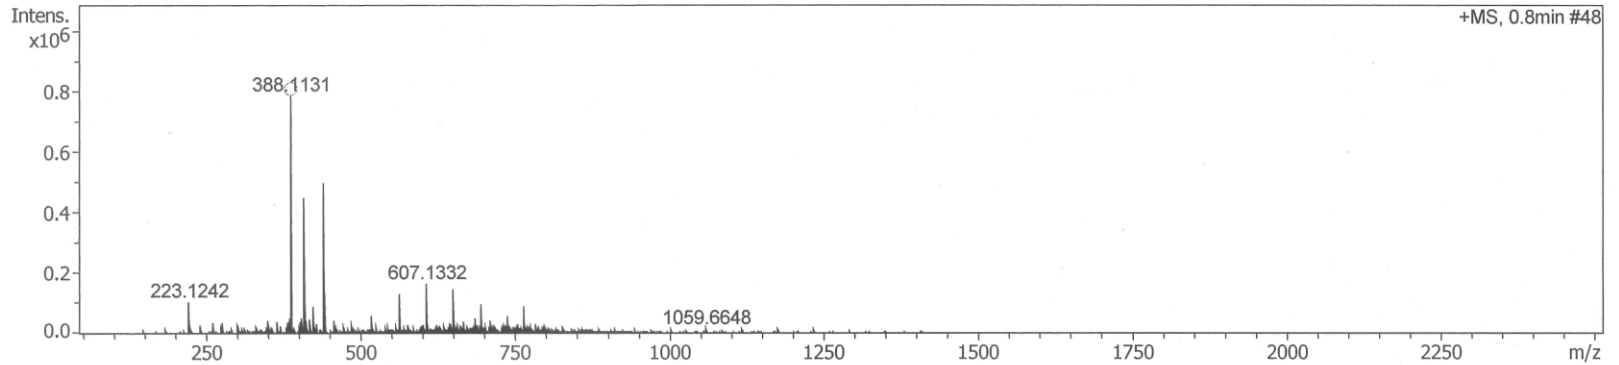

| Meas. m/z | # | Ion Formula   | m/z      | err [ppm] | mSigma | # mSigma | Score  | rdb  | e <sup>-</sup> Conf | N-Rule |
|-----------|---|---------------|----------|-----------|--------|----------|--------|------|---------------------|--------|
| 388.1131  | 1 | C19H18F3NNaO3 | 388.1131 | 0.0       | 3.1    | 1        | 100.00 | 10.0 | even                | ok     |

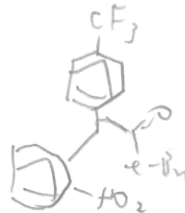

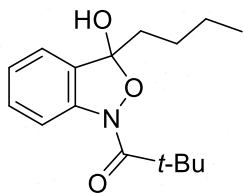

18

# Mass Spectrum SmartFormula Report

## Analysis Info

Analysis Name D:\Data\Data\_Lab\S. Yokoshima. Lab\Kitayama\SK02063 P.d  
 Method esi\_pos\_low\_150to2500.m  
 Sample Name SK02063 P  
 Comment

Acquisition Date 5/25/2022 4:11:17 PM  
 Operator Demo User  
 Instrument compact 8255754.20198

## Acquisition Parameter

|             |            |                      |          |                  |           |
|-------------|------------|----------------------|----------|------------------|-----------|
| Source Type | ESI        | Ion Polarity         | Positive | Set Nebulizer    | 0.3 Bar   |
| Focus       | Not active | Set Capillary        | 4500 V   | Set Dry Heater   | 200 °C    |
| Scan Begin  | 50 m/z     | Set End Plate Offset | -500 V   | Set Dry Gas      | 3.0 l/min |
| Scan End    | 2500 m/z   | Set Charging Voltage | 2000 V   | Set Divert Valve | Source    |
|             |            | Set Corona           | 0 nA     | Set APCI Heater  | 0 °C      |

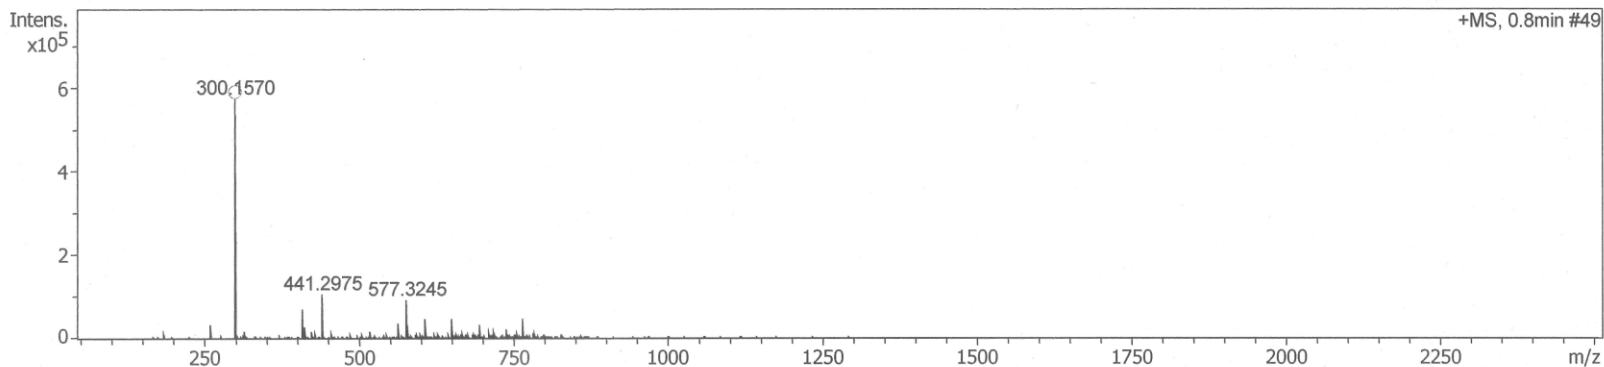

| Meas. m/z | # | Ion Formula                                       | m/z      | err [ppm] | mSigma | # mSigma | Score  | rdb | e <sup>-</sup> Conf | N-Rule |
|-----------|---|---------------------------------------------------|----------|-----------|--------|----------|--------|-----|---------------------|--------|
| 300.1570  | 1 | C <sub>16</sub> H <sub>23</sub> NNaO <sub>3</sub> | 300.1570 | 0.0       | 0.4    | 1        | 100.00 | 6.0 | even                | ok     |

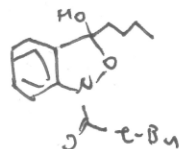

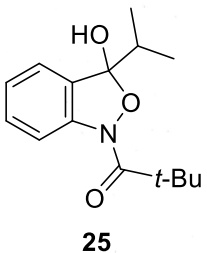

# Mass Spectrum SmartFormula Report

## Analysis Info

Analysis Name D:\Data\Data\_Lab\S. Yokoshima. Lab\Kitayama\SK02093 Prere.d  
 Method esi\_pos\_low\_150to2500.m  
 Sample Name SK02093 Prere  
 Comment

Acquisition Date 5/25/2022 3:09:33 PM  
 Operator Demo User  
 Instrument compact 8255754.20198

## Acquisition Parameter

|             |            |                      |          |                  |           |
|-------------|------------|----------------------|----------|------------------|-----------|
| Source Type | ESI        | Ion Polarity         | Positive | Set Nebulizer    | 0.3 Bar   |
| Focus       | Not active | Set Capillary        | 4500 V   | Set Dry Heater   | 200 °C    |
| Scan Begin  | 50 m/z     | Set End Plate Offset | -500 V   | Set Dry Gas      | 3.0 l/min |
| Scan End    | 2500 m/z   | Set Charging Voltage | 2000 V   | Set Divert Valve | Source    |
|             |            | Set Corona           | 0 nA     | Set APCI Heater  | 0 °C      |

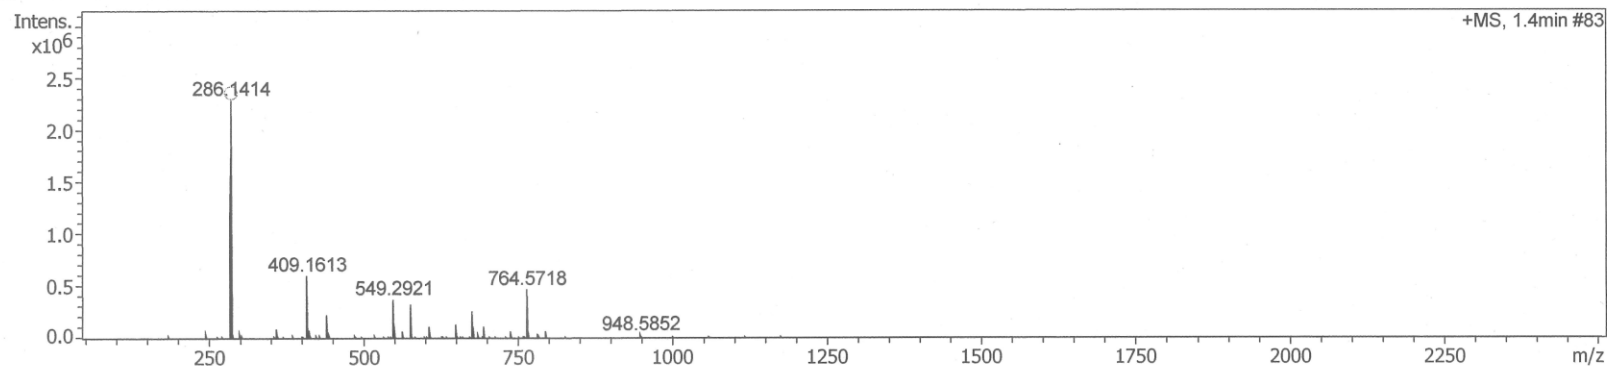

| Meas. m/z | # | Ion Formula                                       | m/z      | err [ppm] | mSigma | # mSigma | Score  | rdb | e <sup>-</sup> Conf | N-Rule |
|-----------|---|---------------------------------------------------|----------|-----------|--------|----------|--------|-----|---------------------|--------|
| 286.1414  | 1 | C <sub>15</sub> H <sub>21</sub> NNaO <sub>3</sub> | 286.1414 | -0.1      | 3.1    | 1        | 100.00 | 6.0 | even                | ok     |

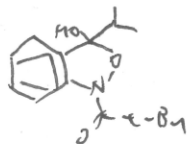

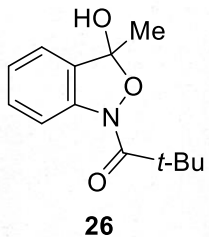

# Compound Spectrum SmartFormula Report

## Analysis Info

Analysis Name D:\Data\Data\_Lab\S. Yokoshima. Lab\Kitayama\SK03025 P2.d  
 Method esi\_pos\_low\_150to2500.m  
 Sample Name SK03025 P2  
 Comment

Acquisition Date 9/11/2022 7:17:22 PM  
 Operator Demo User  
 Instrument compact 8255754.20198

## Acquisition Parameter

|             |            |                       |            |                  |           |
|-------------|------------|-----------------------|------------|------------------|-----------|
| Source Type | ESI        | Ion Polarity          | Positive   | Set Nebulizer    | 0.3 Bar   |
| Focus       | Not active | Set Capillary         | 4500 V     | Set Dry Heater   | 200 °C    |
| Scan Begin  | 50 m/z     | Set End Plate Offset  | -500 V     | Set Dry Gas      | 3.0 l/min |
| Scan End    | 2500 m/z   | Set Collision Cell RF | 1300.0 Vpp | Set Divert Valve | Source    |

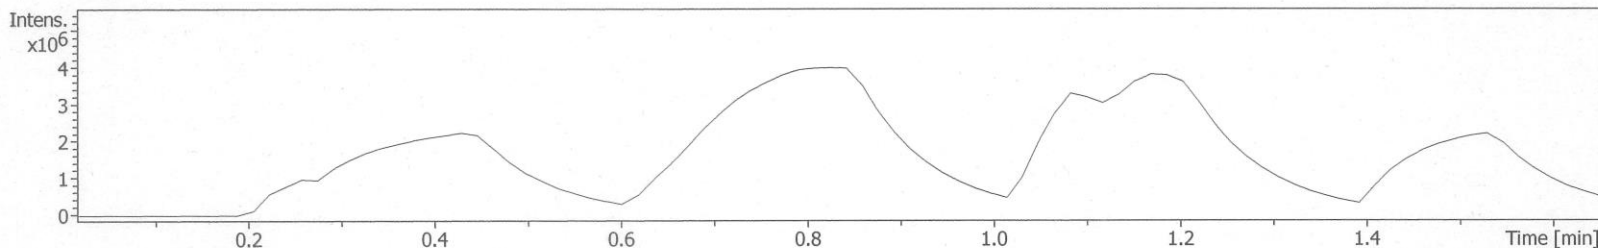

| # | RT [min] | Area | Int. Type | I       | S/N | Trace       | Max. m/z | FWHM [min] |
|---|----------|------|-----------|---------|-----|-------------|----------|------------|
| 1 | 1.5      | 0    |           | 2141378 |     | BPC +All MS | 441.2968 |            |

## Cmpd 1, 1.5 min

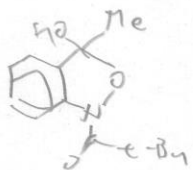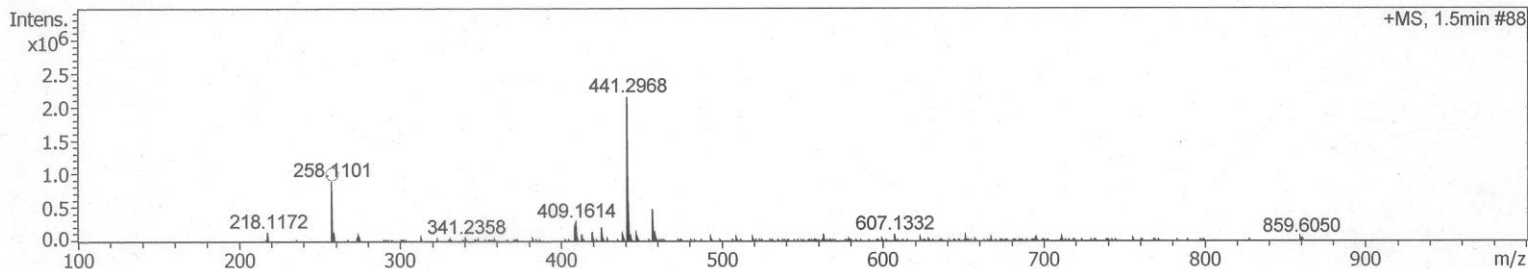

| Meas. m/z | # | Ion Formula | m/z      | err [ppm] | mSigma | # mSigma | Score  | rdb | e <sup>-</sup> Conf | N-Rule |
|-----------|---|-------------|----------|-----------|--------|----------|--------|-----|---------------------|--------|
| 258.1101  | 1 | C13H17NNaO3 | 258.1101 | -0.2      | 3.7    | 1        | 100.00 | 6.0 | even                | ok     |

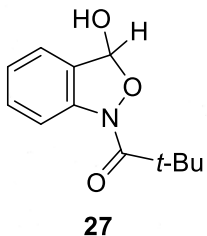

# Mass Spectrum SmartFormula Report

## Analysis Info

Analysis Name D:\Data\Data\_Lab\S. Yokoshima. Lab\Kitayama\SK02098 again2.d  
 Method esi\_pos\_low\_150to2500.m  
 Sample Name SK02098 again2  
 Comment

Acquisition Date 5/25/2022 4:37:37 PM  
 Operator Demo User  
 Instrument compact 8255754.20198

## Acquisition Parameter

|             |            |                      |          |                  |           |
|-------------|------------|----------------------|----------|------------------|-----------|
| Source Type | ESI        | Ion Polarity         | Positive | Set Nebulizer    | 0.3 Bar   |
| Focus       | Not active | Set Capillary        | 4500 V   | Set Dry Heater   | 200 °C    |
| Scan Begin  | 50 m/z     | Set End Plate Offset | -500 V   | Set Dry Gas      | 3.0 l/min |
| Scan End    | 2500 m/z   | Set Charging Voltage | 2000 V   | Set Divert Valve | Source    |
|             |            | Set Corona           | 0 nA     | Set APCI Heater  | 0 °C      |

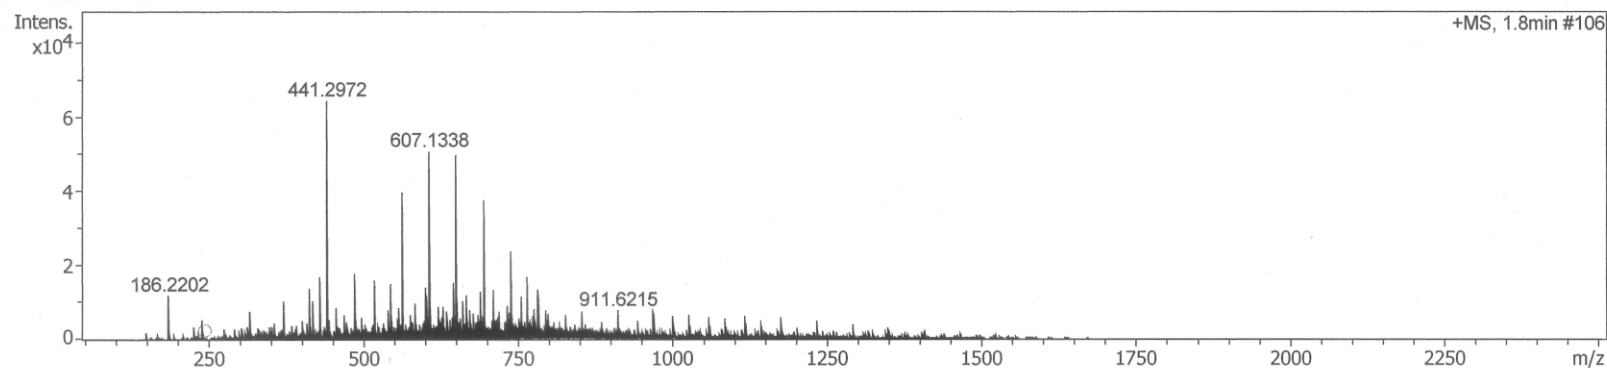

| Meas. m/z | # | Ion Formula                                       | m/z      | err [ppm] | mSigma | # mSigma | Score  | rdb | e <sup>-</sup> Conf | N-Rule |
|-----------|---|---------------------------------------------------|----------|-----------|--------|----------|--------|-----|---------------------|--------|
| 244.0944  | 1 | C <sub>12</sub> H <sub>15</sub> NNaO <sub>3</sub> | 244.0944 | 0.2       | 132.3  | 1        | 100.00 | 6.0 | even                | ok     |

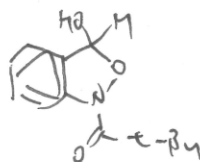

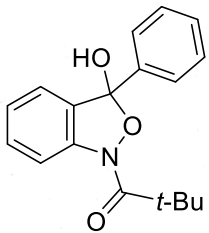

28a (keto:hemiacetal = 1:2)

# Mass Spectrum SmartFormula Report

## Analysis Info

Analysis Name D:\Data\Data\_Lab\S. Yokoshima. Lab\Kitayama\SK02177 P000001.d  
 Method esi\_pos\_low\_150to2500.m  
 Sample Name SK02177 P  
 Comment

Acquisition Date 8/8/2022 2:37:52 PM  
 Operator Demo User  
 Instrument compact 8255754.20198

## Acquisition Parameter

|             |            |                      |          |                  |           |
|-------------|------------|----------------------|----------|------------------|-----------|
| Source Type | ESI        | Ion Polarity         | Positive | Set Nebulizer    | 0.3 Bar   |
| Focus       | Not active | Set Capillary        | 4500 V   | Set Dry Heater   | 200 °C    |
| Scan Begin  | 50 m/z     | Set End Plate Offset | -500 V   | Set Dry Gas      | 3.0 l/min |
| Scan End    | 2500 m/z   | Set Charging Voltage | 2000 V   | Set Divert Valve | Source    |
|             |            | Set Corona           | 0 nA     | Set APCI Heater  | 0 °C      |

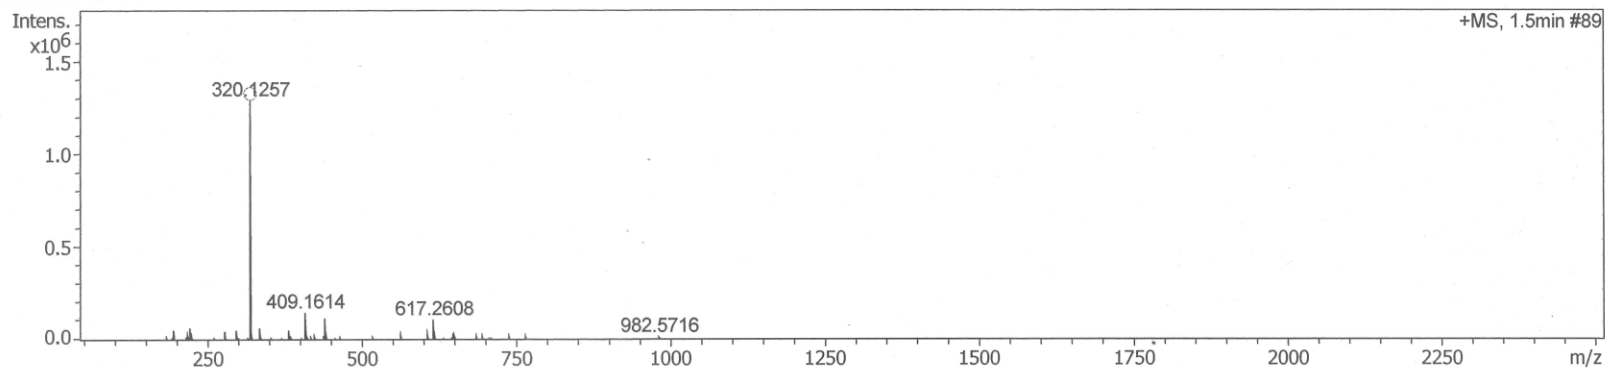

| Meas. m/z | # | Ion Formula                                       | m/z      | err [ppm] | mSigma | # mSigma | Score  | rdb  | e <sup>-</sup> Conf | N-Rule |
|-----------|---|---------------------------------------------------|----------|-----------|--------|----------|--------|------|---------------------|--------|
| 320.1257  | 1 | C <sub>18</sub> H <sub>19</sub> NNaO <sub>3</sub> | 320.1257 | 0.1       | 3.3    | 1        | 100.00 | 10.0 | even                | ok     |

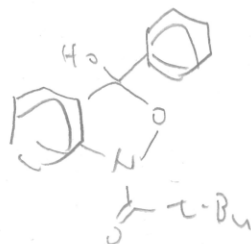



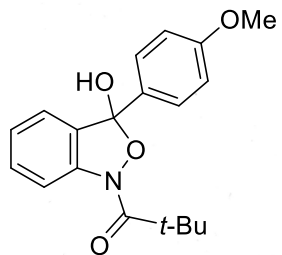

28b (keto:hemiacetal = 3:1) Comment

# Mass Spectrum SmartFormula Report

## Analysis Info

Analysis Name D:\Data\Data\_Lab\S. Yokoshima. Lab\Kitayama\SK02176 P6000001.d  
 Method esi\_pos\_low\_150to2500.m  
 Sample Name SK02176 P6

Acquisition Date 8/8/2022 1:19:53 PM

Operator Demo User  
 Instrument compact 8255754.20198

## Acquisition Parameter

|             |            |                      |          |                  |           |
|-------------|------------|----------------------|----------|------------------|-----------|
| Source Type | ESI        | Ion Polarity         | Positive | Set Nebulizer    | 0.3 Bar   |
| Focus       | Not active | Set Capillary        | 4500 V   | Set Dry Heater   | 200 °C    |
| Scan Begin  | 50 m/z     | Set End Plate Offset | -500 V   | Set Dry Gas      | 3.0 l/min |
| Scan End    | 2500 m/z   | Set Charging Voltage | 2000 V   | Set Divert Valve | Source    |
|             |            | Set Corona           | 0 nA     | Set APCI Heater  | 0 °C      |

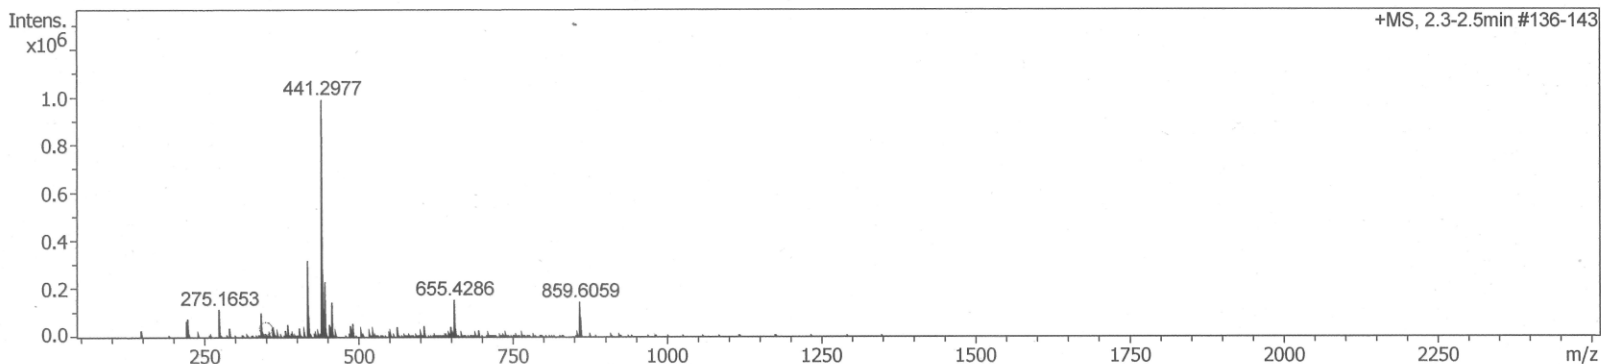

| Meas. m/z | # | Ion Formula                                       | m/z      | err [ppm] | mSigma | # mSigma | Score  | rdb  | e <sup>-</sup> Conf | N-Rule |
|-----------|---|---------------------------------------------------|----------|-----------|--------|----------|--------|------|---------------------|--------|
| 350.1363  | 1 | C <sub>19</sub> H <sub>21</sub> NNaO <sub>4</sub> | 350.1363 | -0.1      | 45.7   | 1        | 100.00 | 10.0 | even                | ok     |

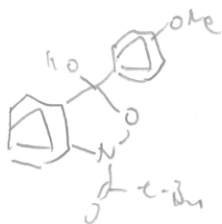

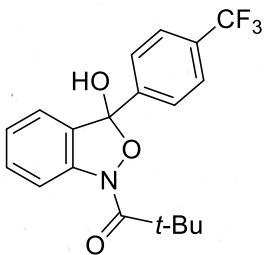

28c

# Mass Spectrum SmartFormula Report

## Analysis Info

Analysis Name D:\Data\Data\_Lab\S. Yokoshima. Lab\Kitayama\SK02180 P rere000001.d  
 Method esi\_pos\_low\_150to2500.m  
 Sample Name SK02180 P rere  
 Comment

Acquisition Date 8/8/2022 2:58:39 PM  
 Operator Demo User  
 Instrument compact 8255754.20198

## Acquisition Parameter

|             |            |                      |          |                  |           |
|-------------|------------|----------------------|----------|------------------|-----------|
| Source Type | ESI        | Ion Polarity         | Positive | Set Nebulizer    | 0.3 Bar   |
| Focus       | Not active | Set Capillary        | 4500 V   | Set Dry Heater   | 200 °C    |
| Scan Begin  | 50 m/z     | Set End Plate Offset | -500 V   | Set Dry Gas      | 3.0 l/min |
| Scan End    | 2500 m/z   | Set Charging Voltage | 2000 V   | Set Divert Valve | Source    |
|             |            | Set Corona           | 0 nA     | Set APCI Heater  | 0 °C      |

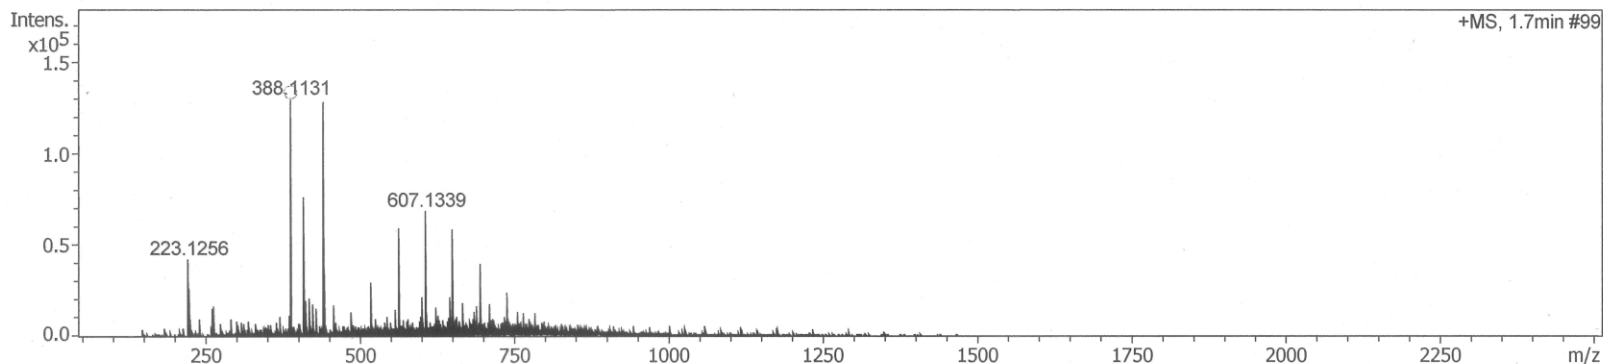

| Meas. m/z | # | Ion Formula                                                      | m/z      | err [ppm] | mSigma | # mSigma | Score  | rdb  | e <sup>-</sup> Conf | N-Rule |
|-----------|---|------------------------------------------------------------------|----------|-----------|--------|----------|--------|------|---------------------|--------|
| 388.1131  | 1 | C <sub>19</sub> H <sub>18</sub> F <sub>3</sub> NNaO <sub>3</sub> | 388.1131 | 0.0       | 2.2    | 1        | 100.00 | 10.0 | even                | ok     |

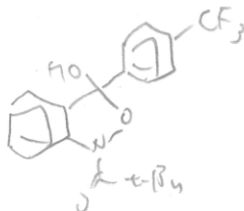

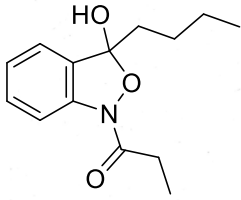

29

# Mass Spectrum SmartFormula Report

## Analysis Info

Analysis Name D:\Data\Data\_Lab\S. Yokoshima. Lab\Kitayama\SK02059 P.d  
 Method esi\_pos\_low\_150to2500.m  
 Sample Name SK02059 P  
 Comment

Acquisition Date 5/25/2022 4:15:17 PM  
 Operator Demo User  
 Instrument compact 8255754.20198

## Acquisition Parameter

|             |            |                      |          |                  |           |
|-------------|------------|----------------------|----------|------------------|-----------|
| Source Type | ESI        | Ion Polarity         | Positive | Set Nebulizer    | 0.3 Bar   |
| Focus       | Not active | Set Capillary        | 4500 V   | Set Dry Heater   | 200 °C    |
| Scan Begin  | 50 m/z     | Set End Plate Offset | -500 V   | Set Dry Gas      | 3.0 l/min |
| Scan End    | 2500 m/z   | Set Charging Voltage | 2000 V   | Set Divert Valve | Source    |
|             |            | Set Corona           | 0 nA     | Set APCI Heater  | 0 °C      |

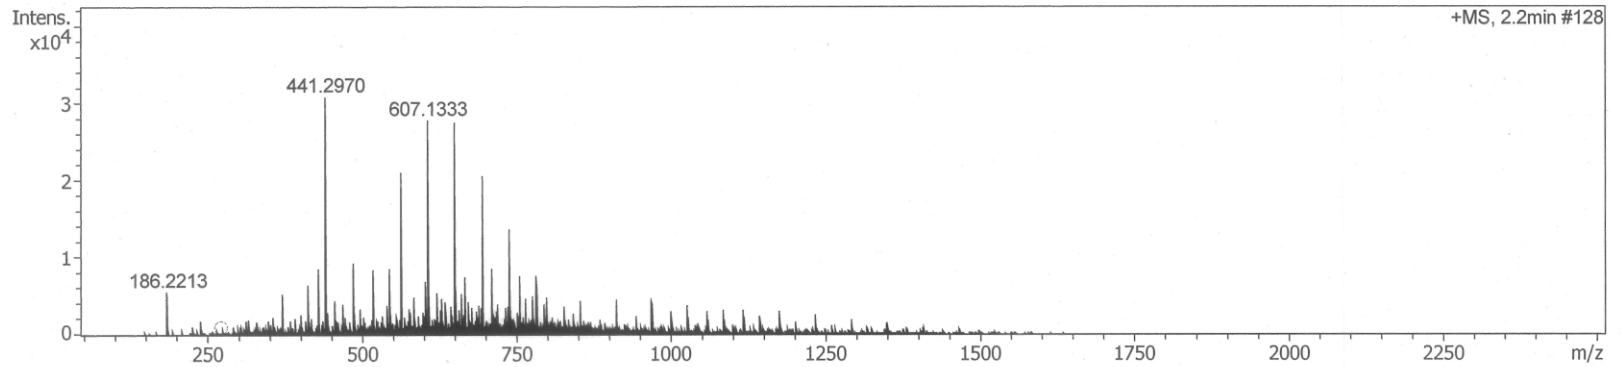

| Meas. m/z | # | Ion Formula                                       | m/z      | err [ppm] | mSigma | # mSigma | Score  | rdb | e <sup>-</sup> Conf | N-Rule |
|-----------|---|---------------------------------------------------|----------|-----------|--------|----------|--------|-----|---------------------|--------|
| 272.1257  | 1 | C <sub>14</sub> H <sub>19</sub> NNaO <sub>3</sub> | 272.1257 | -0.0      | n.a.   | 1        | 100.00 | 6.0 | even                | ok     |

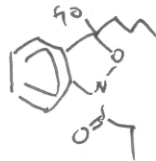

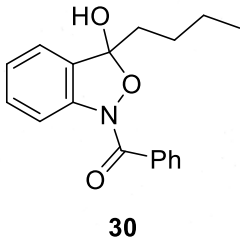

# Mass Spectrum SmartFormula Report

## Analysis Info

Analysis Name D:\Data\Data\_Lab\S. Yokoshima. Lab\Kitayama\SK02062 P.d  
 Method esi\_pos\_low\_150to2500.m  
 Sample Name SK02062 P  
 Comment

Acquisition Date 5/25/2022 3:54:29 PM  
 Operator Demo User  
 Instrument compact 8255754.20198

## Acquisition Parameter

|             |            |                      |          |                  |           |
|-------------|------------|----------------------|----------|------------------|-----------|
| Source Type | ESI        | Ion Polarity         | Positive | Set Nebulizer    | 0.3 Bar   |
| Focus       | Not active | Set Capillary        | 4500 V   | Set Dry Heater   | 200 °C    |
| Scan Begin  | 50 m/z     | Set End Plate Offset | -500 V   | Set Dry Gas      | 3.0 l/min |
| Scan End    | 2500 m/z   | Set Charging Voltage | 2000 V   | Set Divert Valve | Source    |
|             |            | Set Corona           | 0 nA     | Set APCI Heater  | 0 °C      |

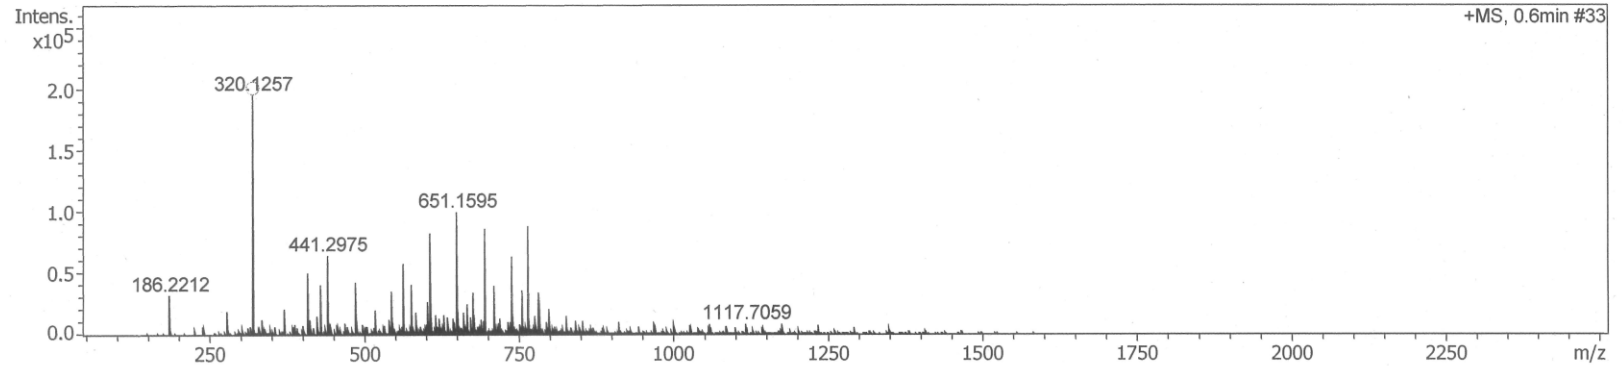

| Meas. m/z | # | Ion Formula                                       | m/z      | err [ppm] | mSigma | # mSigma | Score  | rdB  | e <sup>-</sup> Conf | N-Rule |
|-----------|---|---------------------------------------------------|----------|-----------|--------|----------|--------|------|---------------------|--------|
| 320.1257  | 1 | C <sub>18</sub> H <sub>19</sub> NNaO <sub>3</sub> | 320.1257 | 0.2       | 3.0    | 1        | 100.00 | 10.0 | even                | ok     |

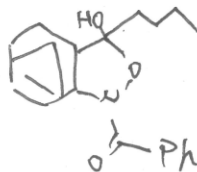

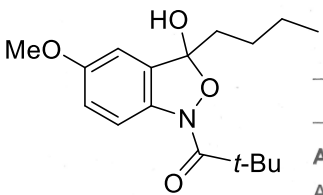

31

# Mass Spectrum SmartFormula Report

## Analysis Info

Analysis Name: D:\Data\Data\_Lab\S. Yokoshima. Lab\Kitayama\SK02070 P.d  
 Method: esi\_pos\_low\_150to2500.m  
 Sample Name: SK02070 P  
 Comment:

Acquisition Date: 5/25/2022 3:22:26 PM  
 Operator: Demo User  
 Instrument: compact  
 8255754.20198

## Acquisition Parameter

|             |            |                      |          |                  |           |
|-------------|------------|----------------------|----------|------------------|-----------|
| Source Type | ESI        | Ion Polarity         | Positive | Set Nebulizer    | 0.3 Bar   |
| Focus       | Not active | Set Capillary        | 4500 V   | Set Dry Heater   | 200 °C    |
| Scan Begin  | 50 m/z     | Set End Plate Offset | -500 V   | Set Dry Gas      | 3.0 l/min |
| Scan End    | 2500 m/z   | Set Charging Voltage | 2000 V   | Set Divert Valve | Source    |
|             |            | Set Corona           | 0 nA     | Set APCI Heater  | 0 °C      |

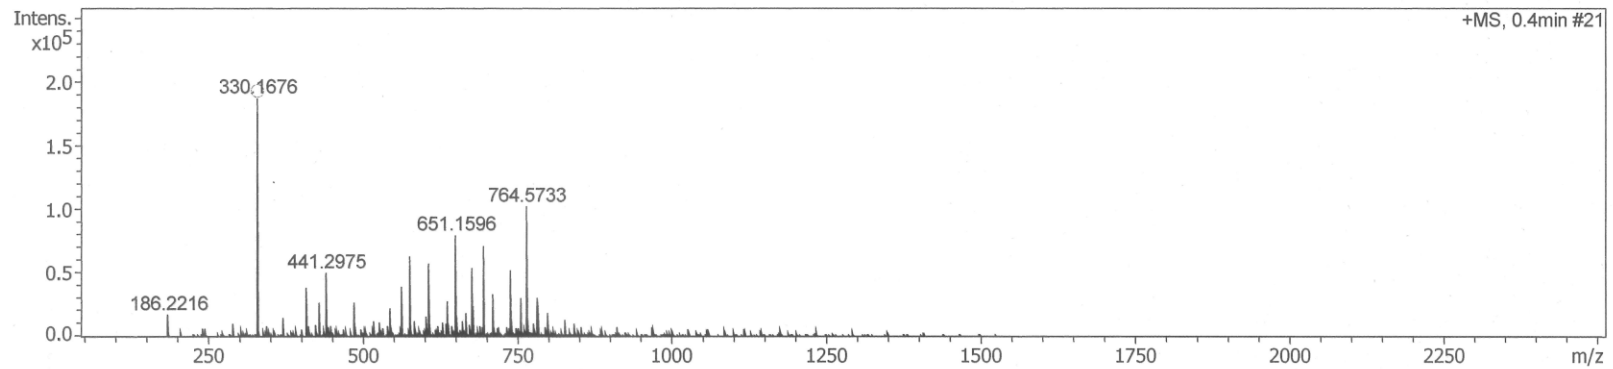

| Meas. m/z | # | Ion Formula                                       | m/z      | err [ppm] | mSigma | # mSigma | Score  | rdb | e <sup>-</sup> Conf | N-Rule |
|-----------|---|---------------------------------------------------|----------|-----------|--------|----------|--------|-----|---------------------|--------|
| 330.1676  | 1 | C <sub>17</sub> H <sub>25</sub> NNaO <sub>4</sub> | 330.1676 | 0.1       | 1.4    | 1        | 100.00 | 6.0 | even                | ok     |

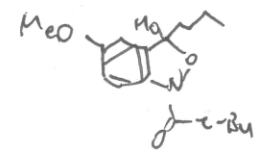

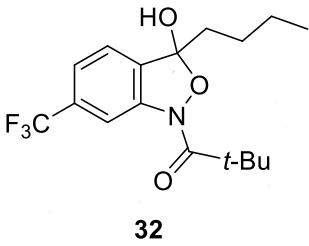

# Mass Spectrum SmartFormula Report

## Analysis Info

Analysis Name: D:\Data\Data\_Lab\S. Yokoshima. Lab\Kitayama\SK02071 Prere.d  
 Method: esi\_pos\_low\_150to2500.m  
 Sample Name: SK02071 Prere  
 Comment:

Acquisition Date: 5/25/2022 3:16:14 PM  
 Operator: Demo User  
 Instrument: compact  
 8255754.20198

## Acquisition Parameter

|             |            |                      |          |                  |           |
|-------------|------------|----------------------|----------|------------------|-----------|
| Source Type | ESI        | Ion Polarity         | Positive | Set Nebulizer    | 0.3 Bar   |
| Focus       | Not active | Set Capillary        | 4500 V   | Set Dry Heater   | 200 °C    |
| Scan Begin  | 50 m/z     | Set End Plate Offset | -500 V   | Set Dry Gas      | 3.0 l/min |
| Scan End    | 2500 m/z   | Set Charging Voltage | 2000 V   | Set Divert Valve | Source    |
|             |            | Set Corona           | 0 nA     | Set APCI Heater  | 0 °C      |

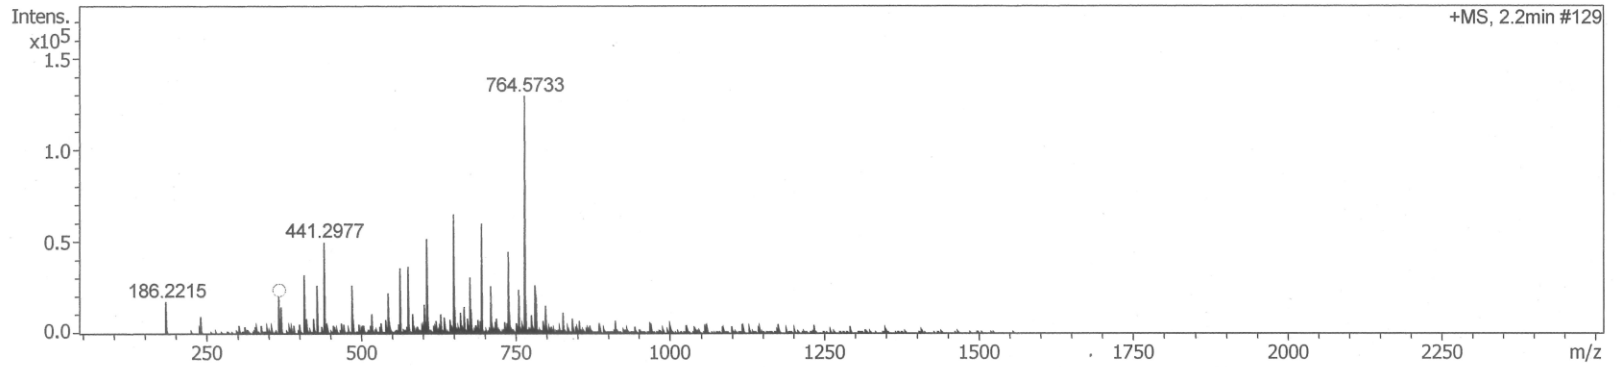

| Meas. m/z | # | Ion Formula   | m/z      | err [ppm] | mSigma | # mSigma | Score  | rdb | e <sup>-</sup> Conf | N-Rule |
|-----------|---|---------------|----------|-----------|--------|----------|--------|-----|---------------------|--------|
| 368.1444  | 1 | C17H22F3NNaO3 | 368.1444 | -0.1      | 19.7   | 1        | 100.00 | 6.0 | even                | ok     |

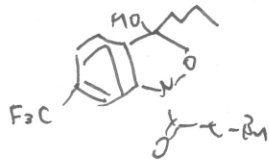

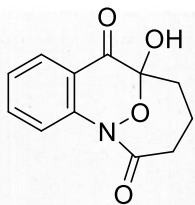

37

# Mass Spectrum SmartFormula Report

## Analysis Info

Analysis Name D:\Data\Data\_Lab\S. Yokoshima. Lab\Kitayama\SK01132 2.d  
 Method esi\_pos\_low\_150to2500.m  
 Sample Name SK01132 2  
 Comment

Acquisition Date 3/3/2022 3:05:52 PM  
 Operator Demo User  
 Instrument compact 8255754.20198

## Acquisition Parameter

|             |            |                      |          |                  |           |
|-------------|------------|----------------------|----------|------------------|-----------|
| Source Type | ESI        | Ion Polarity         | Positive | Set Nebulizer    | 0.3 Bar   |
| Focus       | Not active | Set Capillary        | 4500 V   | Set Dry Heater   | 200 °C    |
| Scan Begin  | 50 m/z     | Set End Plate Offset | -500 V   | Set Dry Gas      | 3.0 l/min |
| Scan End    | 2500 m/z   | Set Charging Voltage | 2000 V   | Set Divert Valve | Source    |
|             |            | Set Corona           | 0 nA     | Set APCI Heater  | 0 °C      |

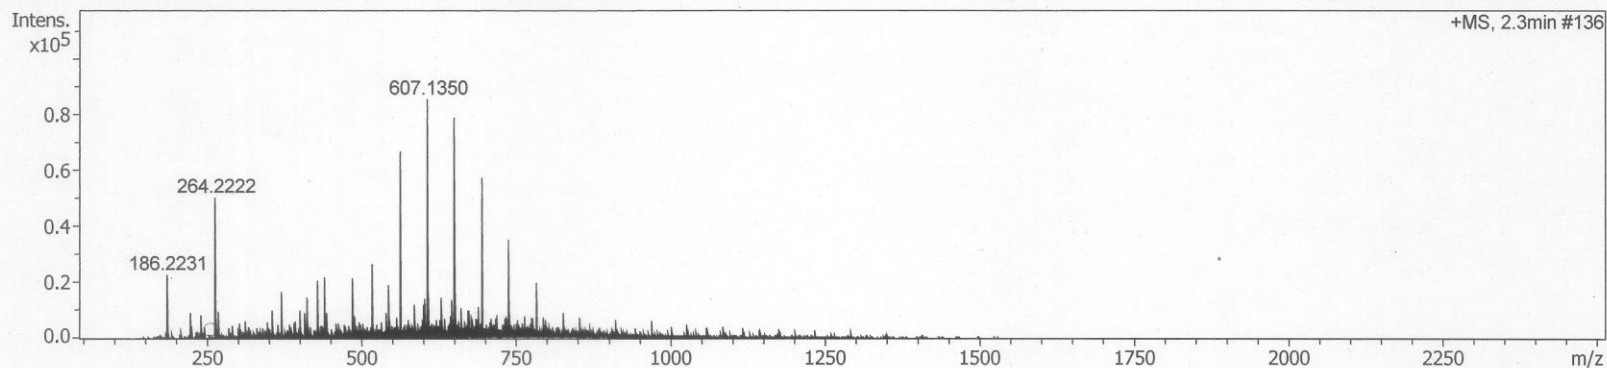

| Meas. m/z | # | Ion Formula                                       | m/z      | err [ppm] | mSigma | # mSigma | Score  | rdb | e <sup>-</sup> Conf | N-Rule |
|-----------|---|---------------------------------------------------|----------|-----------|--------|----------|--------|-----|---------------------|--------|
| 256.0580  | 1 | C <sub>12</sub> H <sub>11</sub> NNaO <sub>4</sub> | 256.0580 | 0.2       | n.a.   | 1        | 100.00 | 8.0 | even                | ok     |

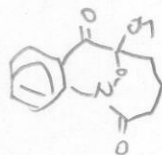

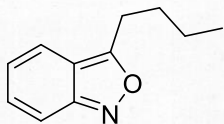

19

# Mass Spectrum SmartFormula Report

## Analysis Info

Analysis Name D:\Data\Data\_Lab\S. Yokoshima. Lab\Kitayama\SK01052 3.d  
 Method esi\_pos\_low\_150to2500.m  
 Sample Name SK01052 3  
 Comment

Acquisition Date 3/3/2022 2:35:46 PM  
 Operator Demo User  
 Instrument compact 8255754.20198

## Acquisition Parameter

|             |            |                      |          |                  |           |
|-------------|------------|----------------------|----------|------------------|-----------|
| Source Type | ESI        | Ion Polarity         | Positive | Set Nebulizer    | 0.3 Bar   |
| Focus       | Not active | Set Capillary        | 4500 V   | Set Dry Heater   | 200 °C    |
| Scan Begin  | 50 m/z     | Set End Plate Offset | -500 V   | Set Dry Gas      | 3.0 l/min |
| Scan End    | 2500 m/z   | Set Charging Voltage | 2000 V   | Set Divert Valve | Source    |
|             |            | Set Corona           | 0 nA     | Set APCI Heater  | 0 °C      |

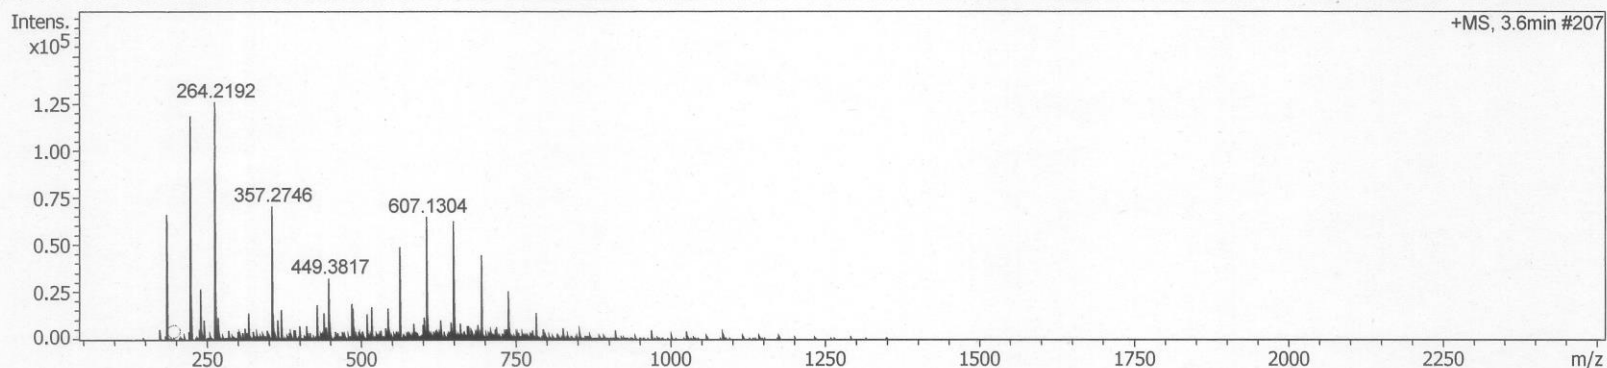

| Meas. m/z | # | Ion Formula                          | m/z      | err [ppm] | mSigma | # mSigma | Score  | rdb | e <sup>-</sup> Conf | N-Rule |
|-----------|---|--------------------------------------|----------|-----------|--------|----------|--------|-----|---------------------|--------|
| 198.0889  | 1 | C <sub>11</sub> H <sub>13</sub> NNaO | 198.0889 | 0.1       | 185.8  | 1        | 100.00 | 6.0 | even                | ok     |

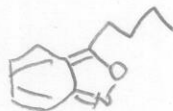



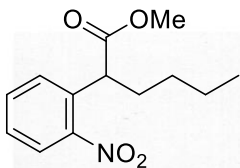

S14

# Mass Spectrum SmartFormula Report

## Analysis Info

Analysis Name D:\Data\Data\_Lab\S. Yokoshima. Lab\Kitayama\SK01212.d  
 Method esi\_pos\_low\_150to2500.m  
 Sample Name SK01212  
 Comment

Acquisition Date 3/2/2022 3:34:42 PM  
 Operator Demo User  
 Instrument compact 8255754.20198

## Acquisition Parameter

|             |            |                      |          |                  |           |
|-------------|------------|----------------------|----------|------------------|-----------|
| Source Type | ESI        | Ion Polarity         | Positive | Set Nebulizer    | 0.3 Bar   |
| Focus       | Not active | Set Capillary        | 4500 V   | Set Dry Heater   | 200 °C    |
| Scan Begin  | 50 m/z     | Set End Plate Offset | -500 V   | Set Dry Gas      | 3.0 l/min |
| Scan End    | 2500 m/z   | Set Charging Voltage | 2000 V   | Set Divert Valve | Source    |
|             |            | Set Corona           | 0 nA     | Set APCI Heater  | 0 °C      |

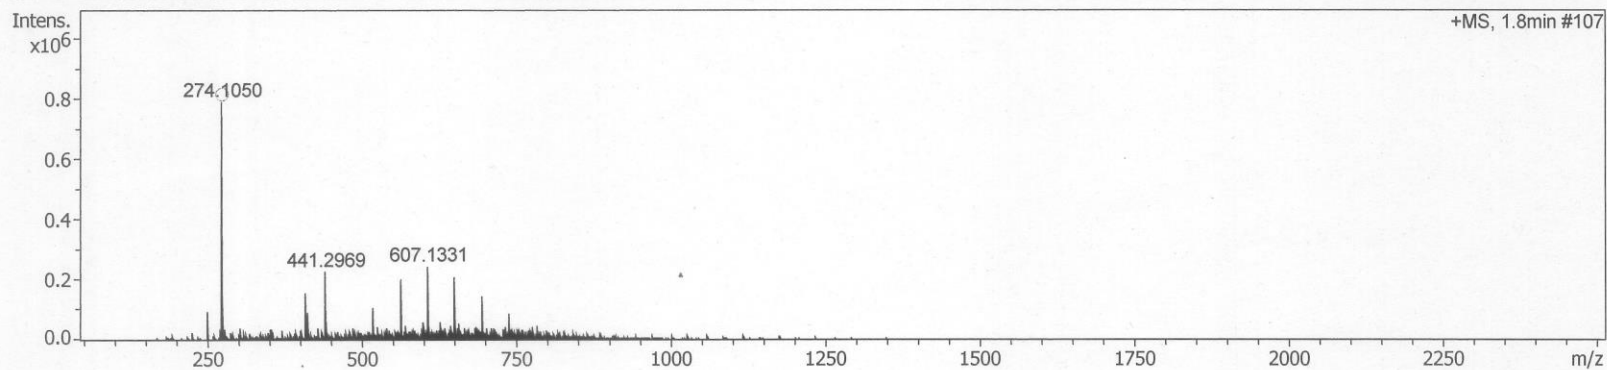

| Meas. m/z | # | Ion Formula | m/z      | err [ppm] | mSigma | # mSigma | Score  | rdb | e <sup>-</sup> Conf | N-Rule |
|-----------|---|-------------|----------|-----------|--------|----------|--------|-----|---------------------|--------|
| 274.1050  | 1 | C13H17NNaO4 | 274.1050 | -0.2      | 1.3    | 1        | 100.00 | 6.0 | even                | ok     |

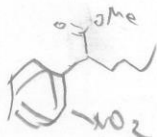

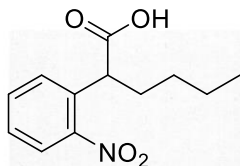

S15

# Mass Spectrum SmartFormula Report

## Analysis Info

Analysis Name D:\Data\Data\_Lab\S. Yokoshima. Lab\Kitayama\SK01213.d  
Method esi\_pos\_low\_150to2500.m  
Sample Name SK01213  
Comment

Acquisition Date 3/3/2022 2:42:57 PM  
Operator Demo User  
Instrument compact 8255754.20198

## Acquisition Parameter

|             |            |                      |          |                  |           |
|-------------|------------|----------------------|----------|------------------|-----------|
| Source Type | ESI        | Ion Polarity         | Positive | Set Nebulizer    | 0.3 Bar   |
| Focus       | Not active | Set Capillary        | 4500 V   | Set Dry Heater   | 200 °C    |
| Scan Begin  | 50 m/z     | Set End Plate Offset | -500 V   | Set Dry Gas      | 3.0 l/min |
| Scan End    | 2500 m/z   | Set Charging Voltage | 2000 V   | Set Divert Valve | Source    |
|             |            | Set Corona           | 0 nA     | Set APCI Heater  | 0 °C      |

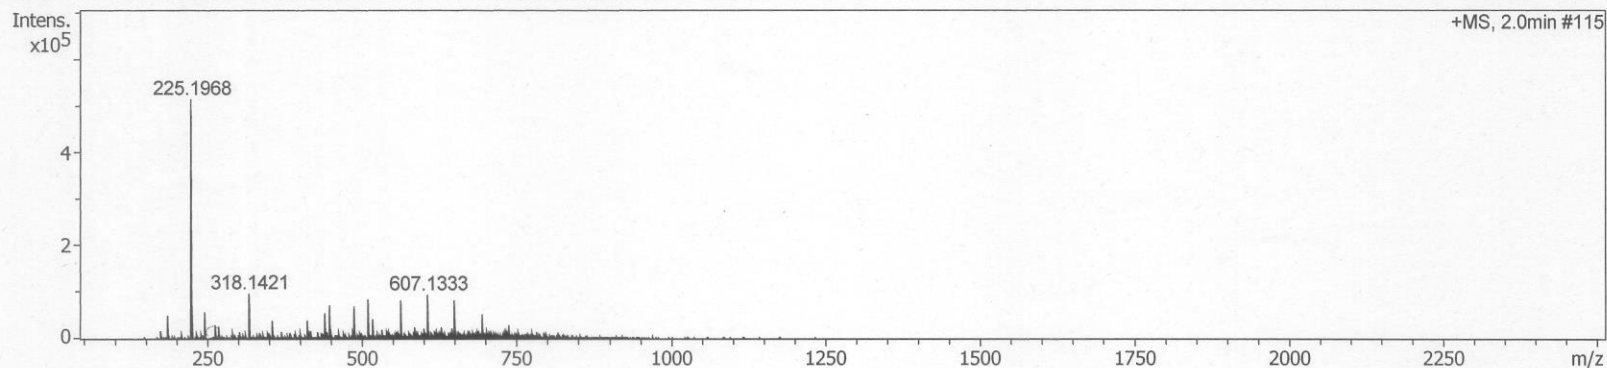

| Meas. m/z | # | Ion Formula | m/z      | err [ppm] | mSigma | # mSigma | Score  | rdb | e <sup>-</sup> Conf | N-Rule |
|-----------|---|-------------|----------|-----------|--------|----------|--------|-----|---------------------|--------|
| 260.0893  | 1 | C12H15NNaO4 | 260.0893 | 0.3       | 698.3  | 1        | 100.00 | 6.0 | even                | ok     |

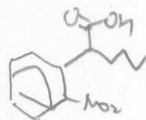

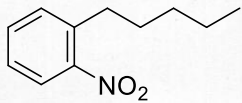

23

# Mass Spectrum SmartFormula Report

## Analysis Info

Analysis Name D:\Data\Data\_Lab\S. Yokoshima. Lab\Kitayama\SK01214 3.d  
 Method esi\_pos\_low\_150to2500.m  
 Sample Name SK01214 3  
 Comment

Acquisition Date 3/3/2022 3:21:14 PM  
 Operator Demo User  
 Instrument compact 8255754.20198

## Acquisition Parameter

|             |            |                      |          |                  |           |
|-------------|------------|----------------------|----------|------------------|-----------|
| Source Type | ESI        | Ion Polarity         | Positive | Set Nebulizer    | 0.3 Bar   |
| Focus       | Not active | Set Capillary        | 4500 V   | Set Dry Heater   | 200 °C    |
| Scan Begin  | 50 m/z     | Set End Plate Offset | -500 V   | Set Dry Gas      | 3.0 l/min |
| Scan End    | 2500 m/z   | Set Charging Voltage | 2000 V   | Set Divert Valve | Source    |
|             |            | Set Corona           | 0 nA     | Set APCI Heater  | 0 °C      |

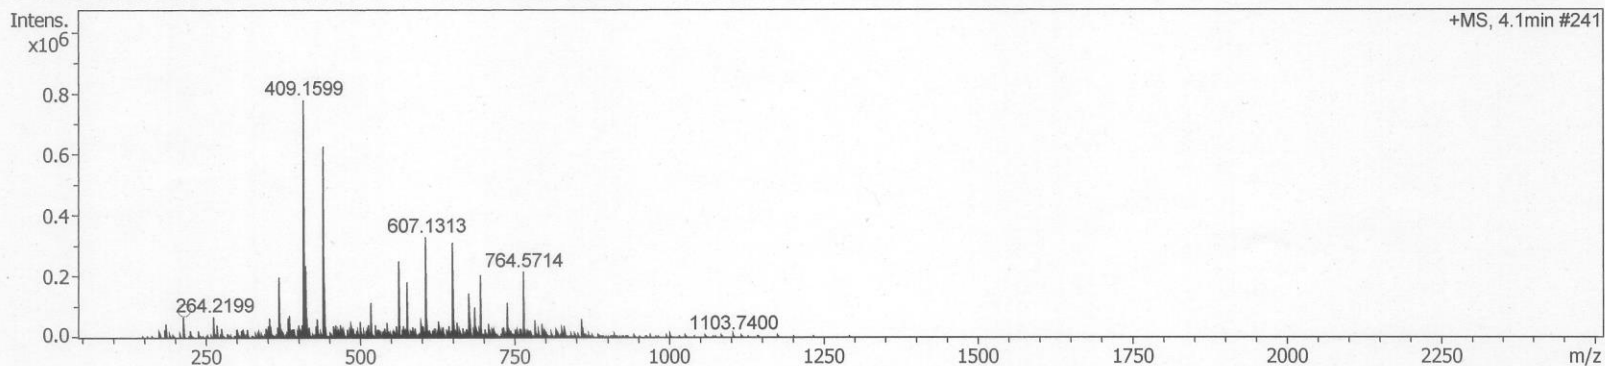

| Meas. m/z | # | Ion Formula | m/z      | err [ppm] | mSigma | # mSigma | Score  | rdb | e <sup>-</sup> Conf | N-Rule |
|-----------|---|-------------|----------|-----------|--------|----------|--------|-----|---------------------|--------|
| 216.0995  | 1 | C11H15NNO2  | 216.0995 | -0.0      | 18.7   | 1        | 100.00 | 5.0 | even                | ok     |

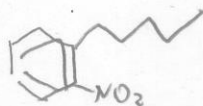

Supplement: d2ob01546c1.pdf [file d2ob01546c1.pdf]
